# Supplementary material for: A copper iodide-catalyzed coupling reaction of benzofuran-3(2H)-ones with amines: an approach to α-ketoamides
Source: Royal Society of Chemistry journal article supplement (doi:10.1039/d1ob00715g), 2021-01-01

## Copper Iodide-Catalyzed Coupling Reaction of Benzofuran-3(2*H*)-ones with Amines: an Approach to $\alpha$ -Ketoamides

Rongxiang Chen,<sup>a</sup> Ruoling Jia,<sup>a</sup> Wenbo Li,<sup>b</sup> Wei Zhao,<sup>a</sup> Kai-Kai Wang,<sup>\*a</sup> Zhan-Yong Wang,<sup>a</sup> Xueji Ma,<sup>a</sup> Wei Dai,<sup>a</sup> and Aili Sun<sup>\*a</sup>

<sup>a</sup> School of Pharmacy, Xinxiang University, Xinxiang 453000, P.R. of China.

<sup>b</sup> School of Chemistry and Materials Engineering, Xinxiang University, Xinxiang 453000, P.R. of China.

Email: wangkaikai@163.com; sunailfly@163.com

Supporting Information

### List of Contents

|                                               |     |
|-----------------------------------------------|-----|
| 1. General information .....                  | S2  |
| 2. General procedures for reactions .....     | S2  |
| 3. Isotope labelled experiment .....          | S2  |
| 4. X-ray crystal structure of <b>3a</b> ..... | S5  |
| 5. Compound characterizations.....            | S8  |
| 6.Reference .....                             | S12 |
| 7. Spectroscopic data for products .....      | S13 |

## 1. General information

All manipulations were carried out under air atmosphere. Column chromatography was generally performed on silica gel (300-400 mesh) and reactions were monitored by thin layer chromatography (TLC) using UV light to visualize the course of the reactions. The  $^1\text{H}$  NMR (400 MHz),  $^{13}\text{C}$  NMR (100 MHz) and  $^{19}\text{F}$  NMR (376 MHz) data were recorded on a Bruker DPX-400 spectrometer with  $\text{CDCl}_3$  as solvent at room temperature unless specified otherwise. The chemical shifts ( $\delta$ ) are reported in ppm and coupling constants ( $J$ ) in Hz.  $^1\text{H}$  NMR spectra was recorded with tetramethylsilane ( $\delta = 0.00$  ppm) as internal reference;  $^{13}\text{C}$  NMR spectra was recorded with  $\text{CDCl}_3$  ( $\delta = 77.00$  ppm) as internal reference. HRMS were performed on Agilent ESI-quadrupole.

## 2. General procedures for reactions

A solution of aryl ketones **1** or **4** (0.3 mmol), secondary amine **2** (4.0 equiv, 1.2 mmol), cuprous iodide (20 mol%, 0.06 mmol), *tert*-butyl hydroperoxide (5.0 equiv, 1.5 mmol, 70% in water) and 1,4-dioxane (2 mL) was stirred in a 10 mL sealed tube at 70 °C for 12 h. After completion of the reaction, the reaction solution was then quenched with saturated  $\text{Na}_2\text{SO}_3$  solution and extracted with ethyl acetate (10 mL  $\times$  3). The combined organic layer was combined and dried with anhydrous  $\text{Na}_2\text{SO}_4$ . Removal of the organic solvent followed by flash column chromatographic purification afforded the desired products using petroleum and ethyl acetate.

## 3. Isotope labelled experiment

A solution of benzofuran-3(2*H*)-one **1a** (0.3 mmol), morpholine **2a** (4.0 equiv, 1.2 mmol), cuprous iodide (20 mol%, 0.06 mmol), *tert*-butyl hydroperoxide (5.0 equiv, 1.5 mmol, 70% in water)  $\text{H}_2^{18}\text{O}$  (2.0 equiv, 0.6 mmol) and 1,4-dioxane (2 mL) was stirred in a 10 mL sealed tube at 70 °C for 12 h. After completion of the reaction, the reaction solution was then quenched with saturated  $\text{Na}_2\text{SO}_3$  solution and extracted with ethyl acetate (10 mL  $\times$  3). The combined organic layer was combined and dried with anhydrous  $\text{Na}_2\text{SO}_4$ . Removal of the organic solvent followed by flash column chromatographic purification afforded **3a** (60 mg, 86% yield) using petroleum and ethyl acetate (3:1). **3a** and **3a**- $^{18}\text{O}$  were detected by LC-MS and the ratio was approximately 2.3 : 1.

# Display Report

## Analysis Info

Analysis Name D:\data\2021\20210514\0514\_RD4\_01\_6026.d  
Method LC\_NO UV\_P50-1500\_6MIN.m  
Sample Name 0514  
Comment

Acquisition Date 5/17/2021 9:29:56 AM

Operator Demo User  
Instrument compact 8255754.20176

## Acquisition Parameter

|             |            |                      |          |                  |           |
|-------------|------------|----------------------|----------|------------------|-----------|
| Source Type | ESI        | Ion Polarity         | Positive | Set Nebulizer    | 3.0 Bar   |
| Focus       | Not active | Set Capillary        | 4000 V   | Set Dry Heater   | 200 °C    |
| Scan Begin  | 50 m/z     | Set End Plate Offset | -500 V   | Set Dry Gas      | 8.0 l/min |
| Scan End    | 1500 m/z   | Set Charging Voltage | 2000 V   | Set Divert Valve | Waste     |
|             |            | Set Corona           | 0 nA     | Set APCI Heater  | 0 °C      |

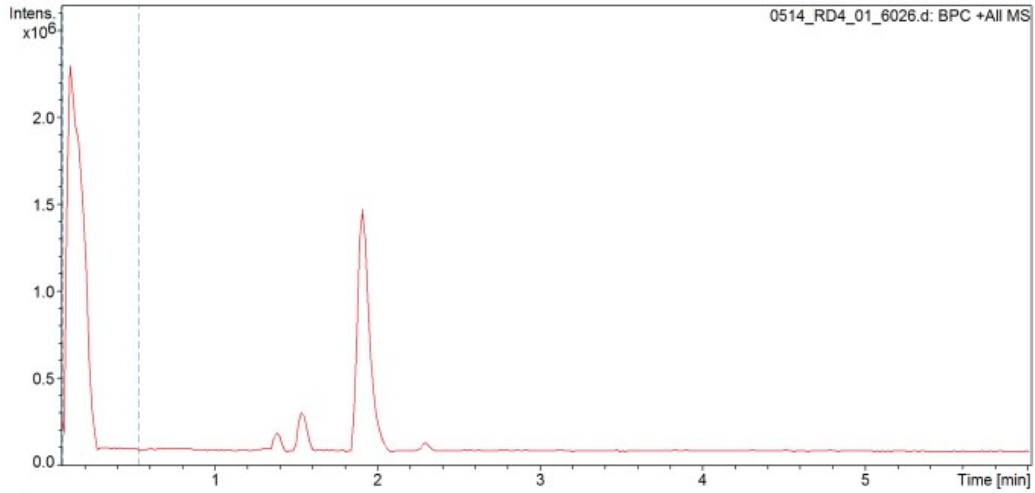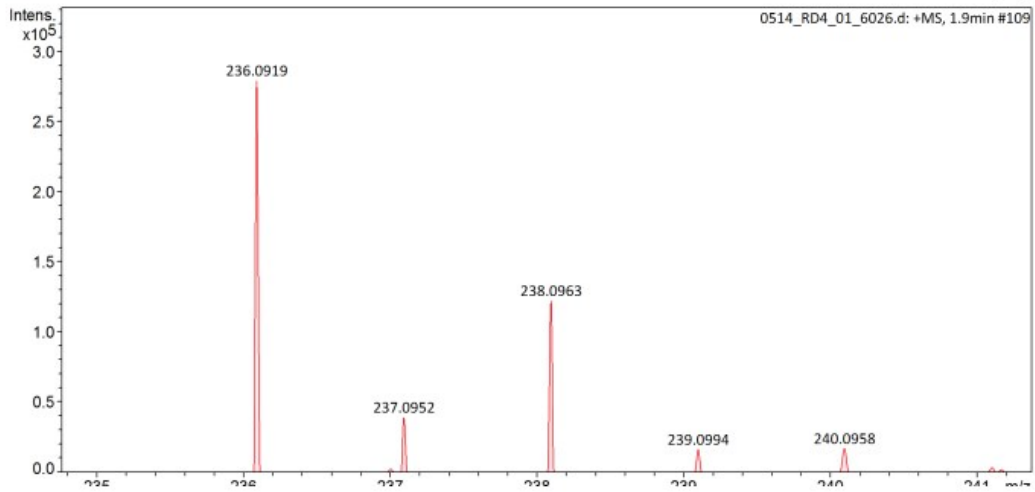

# Display Report

## Analysis Info

Analysis Name D:\data\2021\20210514\0514\_RD4\_01\_6026.d  
Method LC\_NO UV\_P50-1500\_6MIN.m  
Sample Name 0514  
Comment

Acquisition Date 5/17/2021 9:29:56 AM

Operator Demo User  
Instrument compact 8255754.20176

## Acquisition Parameter

|             |            |                      |          |                  |           |
|-------------|------------|----------------------|----------|------------------|-----------|
| Source Type | ESI        | Ion Polarity         | Positive | Set Nebulizer    | 3.0 Bar   |
| Focus       | Not active | Set Capillary        | 4000 V   | Set Dry Heater   | 200 °C    |
| Scan Begin  | 50 m/z     | Set End Plate Offset | -500 V   | Set Dry Gas      | 8.0 l/min |
| Scan End    | 1500 m/z   | Set Charging Voltage | 2000 V   | Set Divert Valve | Waste     |
|             |            | Set Corona           | 0 nA     | Set APCI Heater  | 0 °C      |

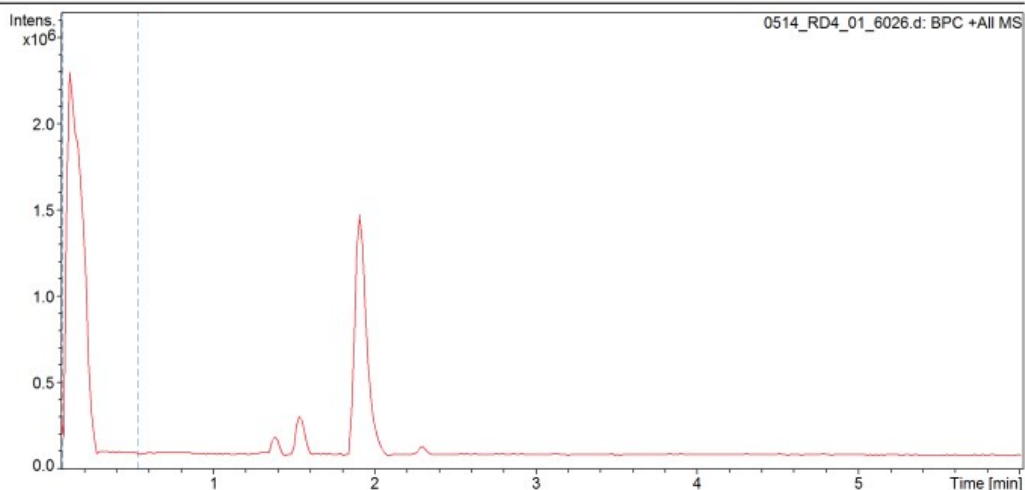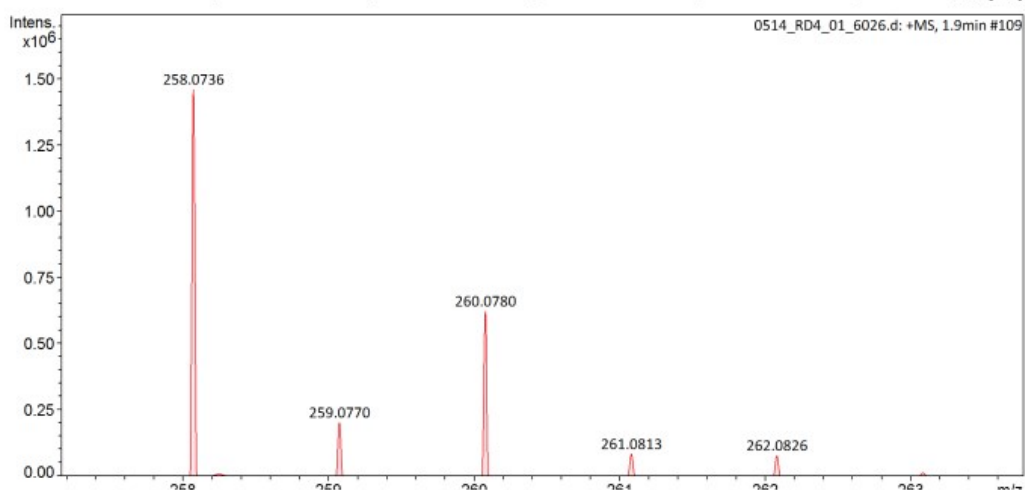

### 3. X-ray crystal structure of 3a

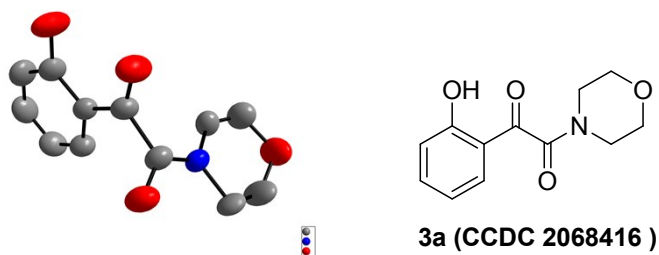

**Table S1.** Crystal data and structure refinement for **3a**.

|                                   |                                                 |
|-----------------------------------|-------------------------------------------------|
| Empirical formula                 | C <sub>12</sub> H <sub>13</sub> NO <sub>4</sub> |
| Formula weight                    | 235.08                                          |
| Temperature                       | 296(2) K                                        |
| Wavelength                        | 71.073 pm                                       |
| Crystal system                    | Monoclinic                                      |
| Space group                       | P 21/n                                          |
| Unit cell dimensions              | a = 12.5895(17) pm<br>$\alpha = 90^\circ$       |
|                                   | b = 5.0682(7) pm<br>$\beta = 92.174(2)^\circ$   |
|                                   | c = 18.033(2) pm<br>$\gamma = 90^\circ$         |
|                                   |                                                 |
| Volume                            | 1149.8(3) nm <sup>3</sup>                       |
| Z                                 | 4                                               |
| Density (calculated)              | 1.356 Mg/m <sup>3</sup>                         |
| Absorption coefficient            | 0.103 mm <sup>-1</sup>                          |
| F(000)                            | 494                                             |
| Crystal size                      | 0.260 x 0.250 x 0.230 mm <sup>3</sup>           |
| Theta range for data collection   | 3.239 to 24.996°                                |
| Index ranges                      | -14 ≤ h ≤ 14, -5 ≤ k ≤ 6, -21 ≤ l ≤ 15          |
| Reflections collected             | 5511                                            |
| Independent reflections           | 2009 [R(int) = 0.0196]                          |
| Completeness to theta = 24.996°   | 99.7 %                                          |
| Data / restraints / parameters    | 2009 / 15 / 211                                 |
| Goodness-of-fit on F <sup>2</sup> | 1.090                                           |
| Final R indices [I > 2σ(I)]       | R1 = 0.0410, wR2 = 0.1156                       |

|                             |                                    |
|-----------------------------|------------------------------------|
| R indices (all data)        | R1 = 0.0603, wR2 = 0.1240          |
| Extinction coefficient      | 0.031(4)                           |
| Largest diff. peak and hole | 0.242 and -0.229 e.Å <sup>-3</sup> |

**Table S2.** Bond lengths [pm] and angles [°] for **3a**.

|              |            |                 |            |
|--------------|------------|-----------------|------------|
| C(1)-C(2)    | 1.363(2)   | C(10A)-H(10A)   | 0.9700     |
| C(1)-C(6)    | 1.398(2)   | C(10A)-H(10B)   | 0.9700     |
| C(1)-H(1A)   | 0.9300     | C(11A)-O(4A)    | 1.394(17)  |
| C(2)-C(3)    | 1.380(3)   | C(11A)-C(12A)   | 1.482(10)  |
| C(2)-H(2)    | 0.9300     | C(11A)-H(11C)   | 0.9700     |
| C(3)-C(4)    | 1.368(3)   | C(11A)-H(11D)   | 0.9700     |
| C(3)-H(3)    | 0.9300     | C(12A)-N(1A)    | 1.458(8)   |
| C(4)-C(5)    | 1.382(2)   | C(12A)-H(12C)   | 0.9700     |
| C(4)-H(4)    | 0.9300     | C(12A)-H(12D)   | 0.9700     |
| C(5)-O(1)    | 1.349(2)   | O(1)-H(1)       | 0.8200     |
| C(5)-C(6)    | 1.410(2)   | C(2)-C(1)-C(6)  | 121.47(17) |
| C(6)-C(7)    | 1.452(2)   | C(2)-C(1)-H(1A) | 119.3      |
| C(7)-O(2)    | 1.2305(19) | C(6)-C(1)-H(1A) | 119.3      |
| C(7)-C(8)    | 1.534(2)   | C(1)-C(2)-C(3)  | 118.99(18) |
| C(8)-O(3)    | 1.2193(19) | C(1)-C(2)-H(2)  | 120.5      |
| C(8)-N(1A)   | 1.346(6)   | C(3)-C(2)-H(2)  | 120.5      |
| C(8)-N(1)    | 1.353(4)   | C(4)-C(3)-C(2)  | 121.49(18) |
| C(9)-N(1)    | 1.477(6)   | C(4)-C(3)-H(3)  | 119.3      |
| C(9)-C(10)   | 1.511(7)   | C(2)-C(3)-H(3)  | 119.3      |
| C(9)-H(9A)   | 0.9700     | C(3)-C(4)-C(5)  | 120.18(17) |
| C(9)-H(9B)   | 0.9700     | C(3)-C(4)-H(4)  | 119.9      |
| C(10)-O(4)   | 1.432(12)  | C(5)-C(4)-H(4)  | 119.9      |
| C(10)-H(10)  | 0.9300     | O(1)-C(5)-C(4)  | 118.11(15) |
| C(11)-O(4)   | 1.411(13)  | O(1)-C(5)-C(6)  | 122.51(15) |
| C(11)-C(12)  | 1.496(6)   | C(4)-C(5)-C(6)  | 119.38(16) |
| C(11)-H(11A) | 0.9700     | C(1)-C(6)-C(5)  | 118.48(15) |
| C(11)-H(11B) | 0.9700     | C(1)-C(6)-C(7)  | 120.64(14) |
| C(12)-N(1)   | 1.448(5)   | C(5)-C(6)-C(7)  | 120.86(14) |
| C(12)-H(12A) | 0.9700     | O(2)-C(7)-C(6)  | 123.76(14) |
| C(12)-H(12B) | 0.9700     | O(2)-C(7)-C(8)  | 117.87(15) |
| C(9A)-N(1A)  | 1.465(7)   | C(6)-C(7)-C(8)  | 118.26(14) |
| C(9A)-C(10A) | 1.491(10)  | O(3)-C(8)-N(1A) | 125.1(3)   |
| C(9A)-H(9AA) | 0.9700     | O(3)-C(8)-N(1)  | 121.6(2)   |
| C(9A)-H(9AB) | 0.9700     | O(3)-C(8)-C(7)  | 117.53(15) |
| C(10A)-O(4A) | 1.449(17)  | N(1A)-C(8)-C(7) | 113.9(3)   |

|                     |          |                      |          |
|---------------------|----------|----------------------|----------|
| N(1)-C(8)-C(7)      | 119.9(2) | O(4A)-C(10A)-C(9A)   | 111.5(7) |
| N(1)-C(9)-C(10)     | 108.7(3) | O(4A)-C(10A)-H(10A)  | 109.3    |
| N(1)-C(9)-H(9A)     | 110.0    | C(9A)-C(10A)-H(10A)  | 109.3    |
| C(10)-C(9)-H(9A)    | 110.0    | O(4A)-C(10A)-H(10B)  | 109.3    |
| N(1)-C(9)-H(9B)     | 110.0    | C(9A)-C(10A)-H(10B)  | 109.3    |
| C(10)-C(9)-H(9B)    | 110.0    | H(10A)-C(10A)-H(10B) | 108.0    |
| H(9A)-C(9)-H(9B)    | 108.3    | O(4A)-C(11A)-C(12A)  | 114.3(8) |
| O(4)-C(10)-C(9)     | 111.3(4) | O(4A)-C(11A)-H(11C)  | 108.7    |
| O(4)-C(10)-H(10)    | 124.3    | C(12A)-C(11A)-H(11C) | 108.7    |
| C(9)-C(10)-H(10)    | 124.3    | O(4A)-C(11A)-H(11D)  | 108.7    |
| O(4)-C(11)-C(12)    | 112.6(6) | C(12A)-C(11A)-H(11D) | 108.7    |
| O(4)-C(11)-H(11A)   | 109.1    | H(11C)-C(11A)-H(11D) | 107.6    |
| C(12)-C(11)-H(11A)  | 109.1    | N(1A)-C(12A)-C(11A)  | 109.2(6) |
| O(4)-C(11)-H(11B)   | 109.1    | N(1A)-C(12A)-H(12C)  | 109.8    |
| C(12)-C(11)-H(11B)  | 109.1    | C(11A)-C(12A)-H(12C) | 109.8    |
| H(11A)-C(11)-H(11B) | 107.8    | N(1A)-C(12A)-H(12D)  | 109.8    |
| N(1)-C(12)-C(11)    | 110.0(3) | C(11A)-C(12A)-H(12D) | 109.8    |
| N(1)-C(12)-H(12A)   | 109.7    | H(12C)-C(12A)-H(12D) | 108.3    |
| C(11)-C(12)-H(12A)  | 109.7    | C(8)-N(1)-C(12)      | 123.7(3) |
| N(1)-C(12)-H(12B)   | 109.7    | C(8)-N(1)-C(9)       | 122.5(4) |
| C(11)-C(12)-H(12B)  | 109.7    | C(12)-N(1)-C(9)      | 113.7(4) |
| H(12A)-C(12)-H(12B) | 108.2    | C(8)-N(1A)-C(12A)    | 119.6(5) |
| N(1A)-C(9A)-C(10A)  | 109.8(5) | C(8)-N(1A)-C(9A)     | 126.5(5) |
| N(1A)-C(9A)-H(9AA)  | 109.7    | C(12A)-N(1A)-C(9A)   | 113.5(5) |
| C(10A)-C(9A)-H(9AA) | 109.7    | C(5)-O(1)-H(1)       | 109.5    |
| N(1A)-C(9A)-H(9AB)  | 109.7    | C(11)-O(4)-C(10)     | 110.2(6) |
| C(10A)-C(9A)-H(9AB) | 109.7    | C(11A)-O(4A)-C(10A)  | 110.5(8) |
| H(9AA)-C(9A)-H(9AB) | 108.2    |                      |          |

## 4. Compound characterizations

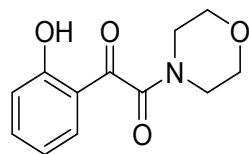

**3a**

**1-(2-hydroxyphenyl)-2-morpholinoethane-1,2-dione (3a).**<sup>[1]</sup> Light yellow solid (88% yield); <sup>1</sup>H NMR (400 MHz, CDCl<sub>3</sub>) δ 11.24 (s, 1H), 7.56 (t, *J* = 7.8 Hz, 2H), 7.03 (d, *J* = 8.2 Hz, 1H), 6.96 (t, *J* = 7.6 Hz, 1H), 3.78 (d, *J* = 9.1 Hz, 4H), 3.69 – 3.64 (m, 2H), 3.43 – 3.37 (m, 2H); <sup>13</sup>C NMR (101 MHz, CDCl<sub>3</sub>) δ 195.9, 163.4, 163.2, 138.0, 131.9, 119.8, 118.6, 116.7, 66.6, 66.5, 46.3, 41.5. HRMS (ESI-TOF): Anal. Calcd. For C<sub>12</sub>H<sub>13</sub>NO<sub>4</sub>: 258.0737, Found: 258.0737 (M+Na<sup>+</sup>).

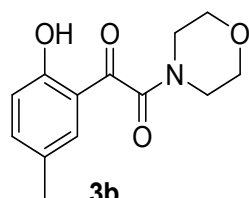

**3b**

**1-(2-hydroxy-5-methylphenyl)-2-morpholinoethane-1,2-dione (3b).** Yellow solid (70% yield); <sup>1</sup>H NMR (400 MHz, CDCl<sub>3</sub>) δ 11.11 (s, 1H), 7.37 (d, *J* = 8.6 Hz, 1H), 7.33 (s, 1H), 6.94 (d, *J* = 8.5 Hz, 1H), 3.81 (d, *J* = 7.3 Hz, 4H), 3.69 – 3.66 (m, 2H), 3.43 – 3.38 (m, 2H), 2.30 (s, 3H); <sup>13</sup>C NMR (101 MHz, CDCl<sub>3</sub>) δ 195.8, 163.6, 161.4, 139.4, 131.3, 129.2, 118.4, 116.4, 66.7, 66.6, 46.4, 41.6, 20.3; HRMS (ESI-TOF): Anal. Calcd. For C<sub>13</sub>H<sub>15</sub>NO<sub>4</sub>: 250.1074, Found: 250.1064 (M+H<sup>+</sup>).

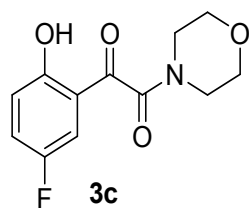

**3c**

**1-(5-fluoro-2-hydroxyphenyl)-2-morpholinoethane-1,2-dione (3c).** White solid (55% yield); <sup>1</sup>H NMR (400 MHz, CDCl<sub>3</sub>) δ 10.97 (s, 1H), 7.27 – 7.18 (m, 2H), 6.95 (dd, *J* = 9.1, 4.3 Hz, 1H), 3.73 (q, *J* = 7.2 Hz, 4H), 3.64 – 3.60 (m, 2H), 3.36 – 3.32 (m, 2H); <sup>19</sup>F NMR (376 MHz, CDCl<sub>3</sub>) δ -122.63; <sup>13</sup>C NMR (101 MHz, CDCl<sub>3</sub>) δ 194.8, 162.9, 159.7, 155.2 (d, *J* = 241.4 Hz), 126.0 (d, *J* = 23.2 Hz), 120.2 (d, *J* = 7.1 Hz), 116.5 (d, *J* = 23.2 Hz), 116.2 (d, *J* = 7.1 Hz), 66.64, 66.55, 46.4, 41.8. HRMS (ESI-TOF): Anal. Calcd. For C<sub>12</sub>H<sub>12</sub>FNO<sub>4</sub>: 254.0823, Found: 254.0819 (M+H<sup>+</sup>).



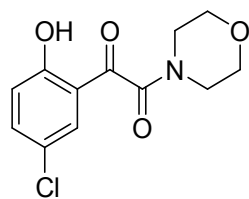

**3d**

**1-(5-chloro-2-hydroxyphenyl)-2-morpholinoethane-1,2-dione (3d).** Light yellow solid (37% yield);  $^1\text{H}$  NMR (400 MHz,  $\text{CDCl}_3$ )  $\delta$  11.19 (s, 1H), 7.55 (s, 1H), 7.51 (d,  $J = 9.0$  Hz, 1H), 7.26 (s, 2H), 7.01 (d,  $J = 8.9$  Hz, 1H), 3.81 (d,  $J = 3.1$  Hz, 4H), 3.72 – 3.68 (m, 2H), 3.44 – 3.39 (m, 2H);  $^{13}\text{C}$  NMR (101 MHz,  $\text{CDCl}_3$ )  $\delta$  194.9, 162.9, 161.9, 138.1, 130.9, 124.7, 120.4, 117.4, 66.7, 66.6, 46.4, 41.9; HRMS (ESI-TOF): Anal. Calcd. For  $\text{C}_{12}\text{H}_{12}\text{ClNO}_4$ : 270.0528, Found: 270.0529 ( $\text{M} + \text{H}^+$ ).

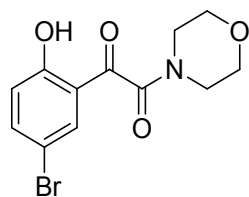

**3e**

**1-(5-bromo-2-hydroxyphenyl)-2-morpholinoethane-1,2-dione (3e).** Light yellow solid (71% yield);  $^1\text{H}$  NMR (400 MHz,  $\text{CDCl}_3$ )  $\delta$  11.20 (s, 1H), 7.69 (d,  $J = 2.3$  Hz, 1H), 7.63 (dd,  $J = 8.9, 2.4$  Hz, 1H), 6.95 (d,  $J = 8.9$  Hz, 1H), 3.81 (q,  $J = 7.3$  Hz, 4H), 3.71 – 3.67 (m, 2H), 3.43 – 3.39 (m, 2H);  $^{13}\text{C}$  NMR (101 MHz,  $\text{CDCl}_3$ )  $\delta$  194.7, 162.8, 162.2, 140.8, 133.8, 120.7, 118.0, 111.4, 66.6, 66.5, 46.4, 41.8; HRMS (ESI-TOF): Anal. Calcd. For  $\text{C}_{12}\text{H}_{12}\text{BrNO}_4$ : 314.0022, Found: 314.0016 ( $\text{M} + \text{H}^+$ ).

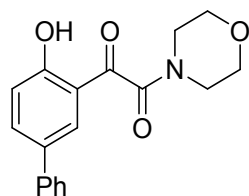

**3f**

**1-(4-hydroxy-[1,1'-biphenyl]-3-yl)-2-morpholinoethane-1,2-dione (3f).** Yellow solid (47% yield);  $^1\text{H}$  NMR (400 MHz,  $\text{CDCl}_3$ )  $\delta$  11.28 (s, 1H), 7.85 – 7.72 (m, 2H), 7.50 (d,  $J = 7.7$  Hz, 2H), 7.44 (t,  $J = 7.5$  Hz, 2H), 7.36 (t,  $J = 7.1$  Hz, 1H), 7.12 (d,  $J = 8.7$  Hz, 1H), 3.80 (s, 4H), 3.71 – 3.65 (m, 2H), 3.45 – 3.38 (m, 2H);  $^{13}\text{C}$  NMR (101 MHz,  $\text{CDCl}_3$ )  $\delta$  196.0, 163.4, 162.7, 139.2, 137.1, 133.38, 130.0, 129.0, 127.5, 126.7, 119.1, 116.8, 66.7, 66.6, 46.4, 41.7; HRMS (ESI-TOF): Anal. Calcd. For  $\text{C}_{18}\text{H}_{17}\text{NO}_4$ : 334.1050, Found: 334.1049 ( $\text{M} + \text{Na}^+$ ).

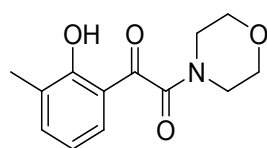

**3g**

**1-(2-hydroxy-3-methylphenyl)-2-morpholinoethane-1,2-dione (3g).** Light yellow solid (71%

yield);  $^1\text{H}$  NMR (400 MHz,  $\text{CDCl}_3$ )  $\delta$  11.53 (s, 1H), 7.42 (t,  $J = 7.4$  Hz, 2H), 6.87 (t,  $J = 7.7$  Hz, 1H), 3.82 – 3.76 (m, 4H), 3.68 – 3.64 (m, 2H), 3.41 – 3.36 (m, 2H), 2.28 (s, 3H);  $^{13}\text{C}$  NMR (101 MHz,  $\text{CDCl}_3$ )  $\delta$  196.3, 163.7, 161.8, 138.8, 129.5, 127.9, 119.3, 116.0, 66.65, 66.59, 46.3, 41.6, 15.2; HRMS (ESI-TOF): Anal. Calcd. For  $\text{C}_{13}\text{H}_{15}\text{NO}_4$ : 250.1074, Found: 250.1069 ( $\text{M}+\text{H}^+$ ).

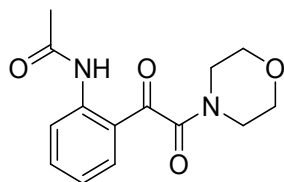

**3h**

**N-(2-(2-morpholino-2-oxoacetyl)phenyl)acetamide (3h)**.<sup>[2]</sup> Brown solid (47% yield);  $^1\text{H}$  NMR (400 MHz,  $\text{CDCl}_3$ )  $\delta$  11.23 (s, 1H), 8.80 (d,  $J = 8.5$  Hz, 1H), 7.74 – 7.58 (m, 2H), 7.16 (t,  $J = 7.6$  Hz, 1H), 3.83 – 3.75 (m, 4H), 3.70 – 3.63 (m, 2H), 3.40 – 3.33 (m, 2H), 2.27 (s, 3H);  $^{13}\text{C}$  NMR (101 MHz,  $\text{CDCl}_3$ )  $\delta$  195.2, 169.4, 164.4, 142.4, 137.1, 133.4, 122.7, 120.7, 117.6, 66.5, 46.3, 41.6, 25.5; HRMS (ESI-TOF): Anal. Calcd. For  $\text{C}_{14}\text{H}_{16}\text{N}_2\text{O}_4$ : 299.1002, Found: 299.1003 ( $\text{M}+\text{Na}^+$ ).

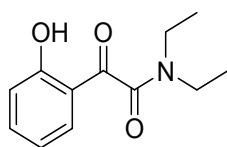

**3i**

**N,N-diethyl-2-(2-hydroxyphenyl)-2-oxoacetamide (3i)**. Yellow liquid (72% yield);  $^1\text{H}$  NMR (400 MHz,  $\text{CDCl}_3$ )  $\delta$  11.27 (s, 1H), 7.49 – 7.39 (m, 2H), 6.93 (d,  $J = 8.3$  Hz, 1H), 6.85 (t,  $J = 7.6$  Hz, 1H), 3.48 (q,  $J = 7.2$  Hz, 2H), 3.18 (q,  $J = 7.1$  Hz, 2H), 1.21 (t,  $J = 7.2$  Hz, 3H), 1.09 (t,  $J = 7.1$  Hz, 3H);  $^{13}\text{C}$  NMR (101 MHz,  $\text{CDCl}_3$ )  $\delta$  196.5, 164.7, 163.1, 137.6, 131.9, 119.6, 118.4, 116.7, 42.2, 38.7, 13.9, 12.6; HRMS (ESI-TOF): Anal. Calcd. For  $\text{C}_{12}\text{H}_{15}\text{NO}_3$ : 244.0944, Found: 244.0953 ( $\text{M}+\text{Na}^+$ ).

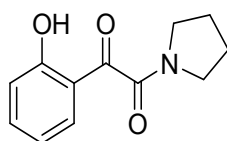

**3j**

**1-(2-hydroxyphenyl)-2-(pyrrolidin-1-yl)ethane-1,2-dione (3j)**. Yellow liquid (52% yield);  $^1\text{H}$  NMR (400 MHz,  $\text{CDCl}_3$ )  $\delta$  11.30 (s, 1H), 7.59 – 7.53 (m, 1H), 7.47 (t,  $J = 7.9$  Hz, 1H), 6.95 (d,  $J = 8.4$  Hz, 1H), 6.87 (t,  $J = 7.6$  Hz, 1H), 3.59 (t,  $J = 6.7$  Hz, 2H), 3.37 (t,  $J = 6.4$  Hz, 2H), 1.94 – 1.85 (m, 4H);  $^{13}\text{C}$  NMR (101 MHz,  $\text{CDCl}_3$ )  $\delta$  196.3, 163.5, 163.2, 137.8, 132.3, 119.7, 118.4, 116.5, 46.7, 45.3, 25.8, 24.0; HRMS (ESI-TOF): Anal. Calcd. For  $\text{C}_{12}\text{H}_{13}\text{NO}_3$ : 242.0788, Found: 242.0791 ( $\text{M}+\text{Na}^+$ ).

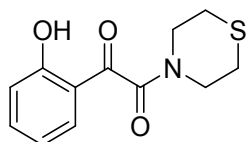

**3k**

**1-(2-hydroxyphenyl)-2-thiomorpholinoethane-1,2-dione (3k).** Yellow solid (69% yield);  $^1\text{H}$  NMR (400 MHz,  $\text{CDCl}_3$ )  $\delta$  11.24 (s, 1H), 7.55 (dd,  $J = 17.8, 8.0$  Hz, 2H), 7.04 (d,  $J = 8.4$  Hz, 1H), 6.96 (t,  $J = 7.6$  Hz, 1H), 4.08 – 3.96 (m, 2H), 3.69 – 3.58 (m, 2H), 2.80 – 2.71 (m, 2H), 2.67 – 2.58 (m, 2H);  $^{13}\text{C}$  NMR (101 MHz,  $\text{CDCl}_3$ )  $\delta$  196.1, 163.7, 163.3, 138.1, 131.9, 119.8, 118.6, 116.6, 48.8, 43.7, 27.8, 27.3; HRMS (ESI-TOF): Anal. Calcd. For  $\text{C}_{12}\text{H}_{13}\text{NO}_3\text{S}$ : 252.0689, Found: 252.0692 ( $\text{M}+\text{H}^+$ ).

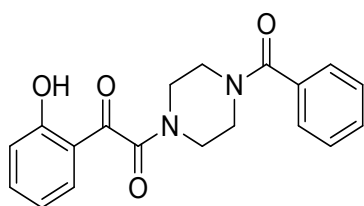

**3l**

**1-(4-benzoylpiperazin-1-yl)-2-(2-hydroxyphenyl)ethane-1,2-dione (3l).** Yellow solid (86% yield);  $^1\text{H}$  NMR (400 MHz,  $\text{CDCl}_3$ )  $\delta$  11.21 (s, 1H), 7.57 (t,  $J = 8.1$  Hz, 2H), 7.43 (d,  $J = 11.3$  Hz, 5H), 7.04 (d,  $J = 8.3$  Hz, 1H), 6.96 (t,  $J = 7.6$  Hz, 1H), 3.74 (d,  $J = 40.5$  Hz, 6H), 3.42 (s, 2H);  $^{13}\text{C}$  NMR (101 MHz,  $\text{CDCl}_3$ )  $\delta$  195.7, 170.7, 163.6, 163.3, 138.2, 134.7, 131.9, 130.3, 128.7, 127.0, 119.9, 118.7, 116.7, 46.06, 46.02, 41.43, 41.40; HRMS (ESI-TOF): Anal. Calcd. For  $\text{C}_{19}\text{H}_{18}\text{N}_2\text{O}_4$ : 361.1159, Found: 361.1165 ( $\text{M}+\text{Na}^+$ ).

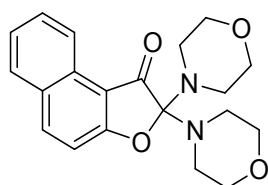

**3p'**

**2,2-dimorpholinonaphtho[2,1-b]furan-1(2H)-one (3p').**<sup>[3]</sup> Yellow solid (28% yield);  $^1\text{H}$  NMR (400 MHz,  $\text{CDCl}_3$ )  $\delta$  8.71 (d,  $J = 8.2$  Hz, 1H), 8.12 (d,  $J = 9.0$  Hz, 1H), 7.81 (d,  $J = 8.2$  Hz, 1H), 7.66 (t,  $J = 7.6$  Hz, 1H), 7.47 (t,  $J = 7.6$  Hz, 1H), 7.20 (d,  $J = 9.0$  Hz, 1H), 3.69 (t,  $J = 4.6$  Hz, 8H), 3.03 – 2.94 (m, 4H), 2.80 – 2.73 (m, 4H);  $^{13}\text{C}$  NMR (101 MHz,  $\text{CDCl}_3$ )  $\delta$  197.4, 173.3, 141.4, 130.3, 129.0, 128.6, 128.5, 125.4, 123.0, 113.2, 113.1, 110.5, 66.9, 45.7; HRMS (ESI-TOF): Anal. Calcd. For  $\text{C}_{20}\text{H}_{22}\text{N}_2\text{O}_4$ : 377.1472, Found: 377.1478 ( $\text{M}+\text{Na}^+$ ).

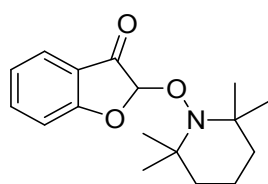

**4**

**2-((2,2,6,6-tetramethylpiperidin-1-yl)oxy)benzofuran-3(2H)-one (4).**<sup>[4]</sup> White solid (20% yield); <sup>1</sup>H NMR (400 MHz, CDCl<sub>3</sub>) δ 7.61 (dd, *J* = 13.5, 7.7 Hz, 2H), 7.04 (dd, *J* = 8.0, 5.6 Hz, 2H), 5.73 (s, 1H), 1.54 (d, *J* = 6.6 Hz, 5H), 1.46 (s, 3H), 1.35 (s, 4H), 1.23 (s, 3H), 1.12 – 1.03 (m, 4H); <sup>13</sup>C NMR (101 MHz, CDCl<sub>3</sub>) δ 195.2, 171.1, 138.7, 124.7, 121.8, 119.8, 113.3, 106.3, 61.7, 59.6, 40.4, 40.2, 33.8, 32.2, 20.4, 20.1, 17.0; HRMS (ESI-TOF): Anal. Calcd. For C<sub>17</sub>H<sub>23</sub>NO<sub>3</sub>: 290.1751, Found: 290.1758 (M+H<sup>+</sup>).

## 5. Reference

- [1] L. Dutta and P. J. Bhuyan, *Tetrahedron*, 2018, **74**, 5770.  
[2] B. T. Gonçalves, P. M. Esteves, A. C. Pinto, C. R. Kaiser, F. L. da Silva, E. Miguez and J. F. M. da Silva, *Magn. Reson. Chem.* 2008, **46**, 418.  
[3] H. Yu, W. Huang and F. Zhang, *Eur. J. Org. Chem.* 2014, **2014**, 3156.  
[4] Y.-X. Xie, R.-J. Song, Y. Liu, Y.-Y. Liu, J.-N. Xiang and J.-H. Li, *Adv. Synth. Catal.* 2013, **355**, 3387.

## 6. Spectroscopic data for products

<sup>1</sup>H NMR (400MHz, CDCl<sub>3</sub>) spectra of **3a**

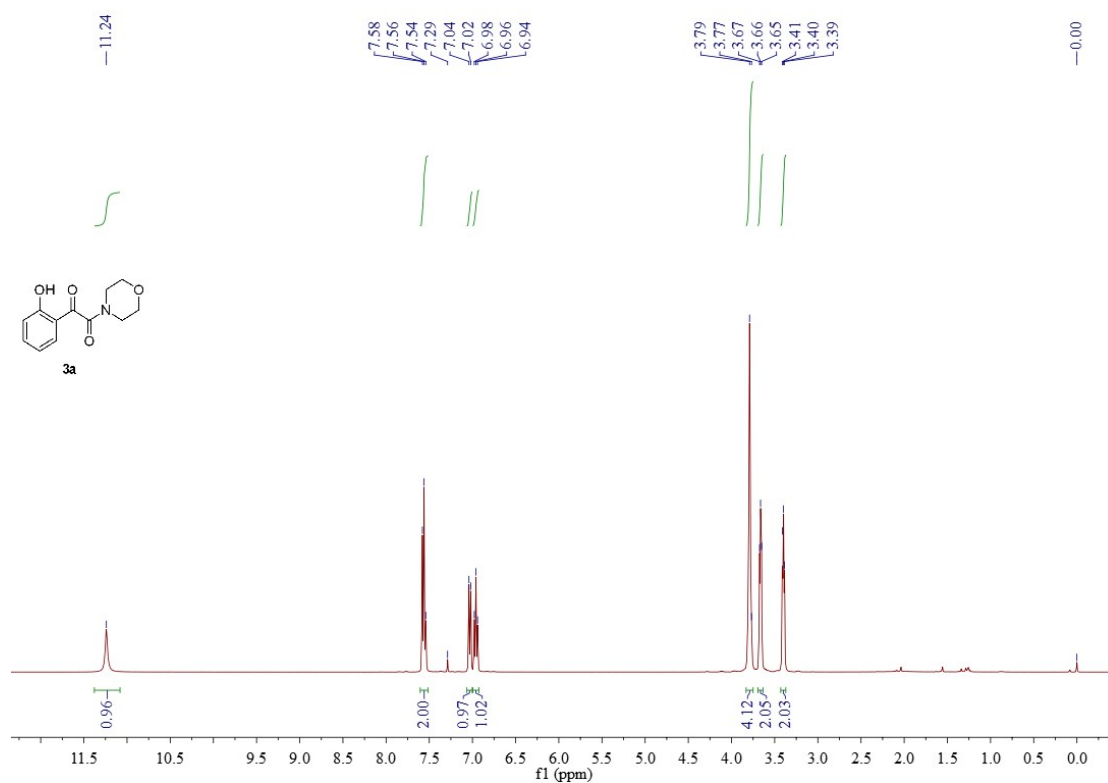

<sup>13</sup>C NMR (101MHz, CDCl<sub>3</sub>) spectra of **3a**

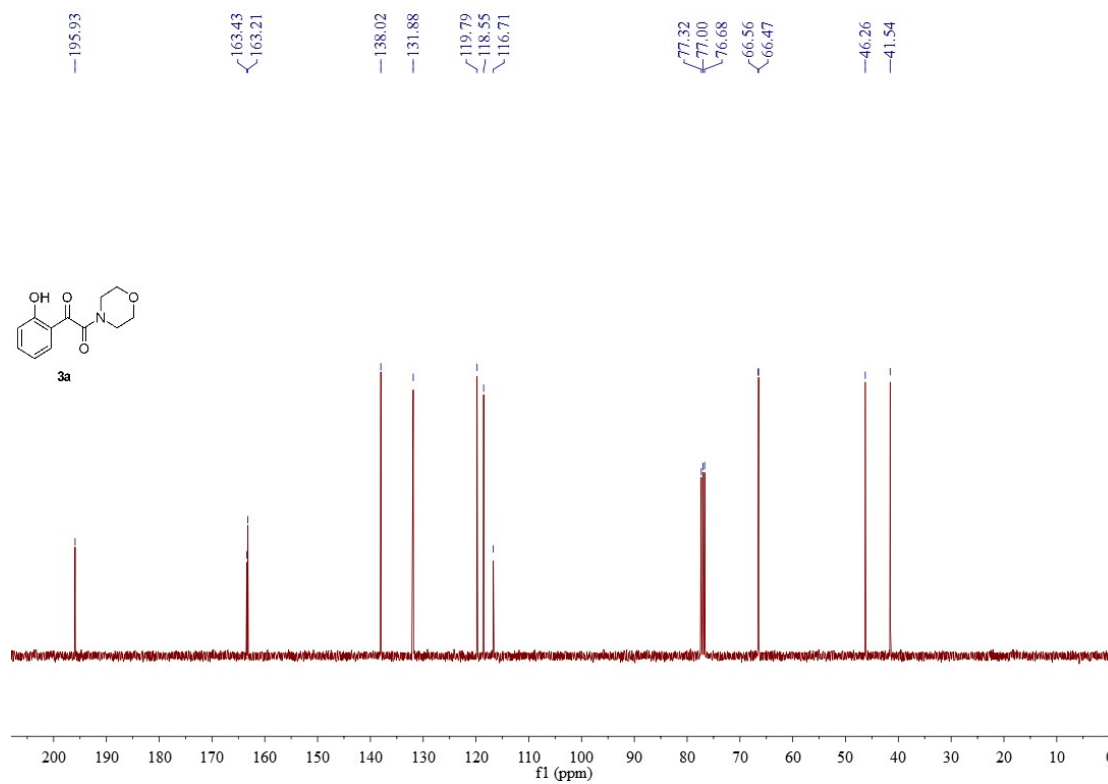

<sup>1</sup>H NMR (400MHz, CDCl<sub>3</sub>) spectra of **3b**

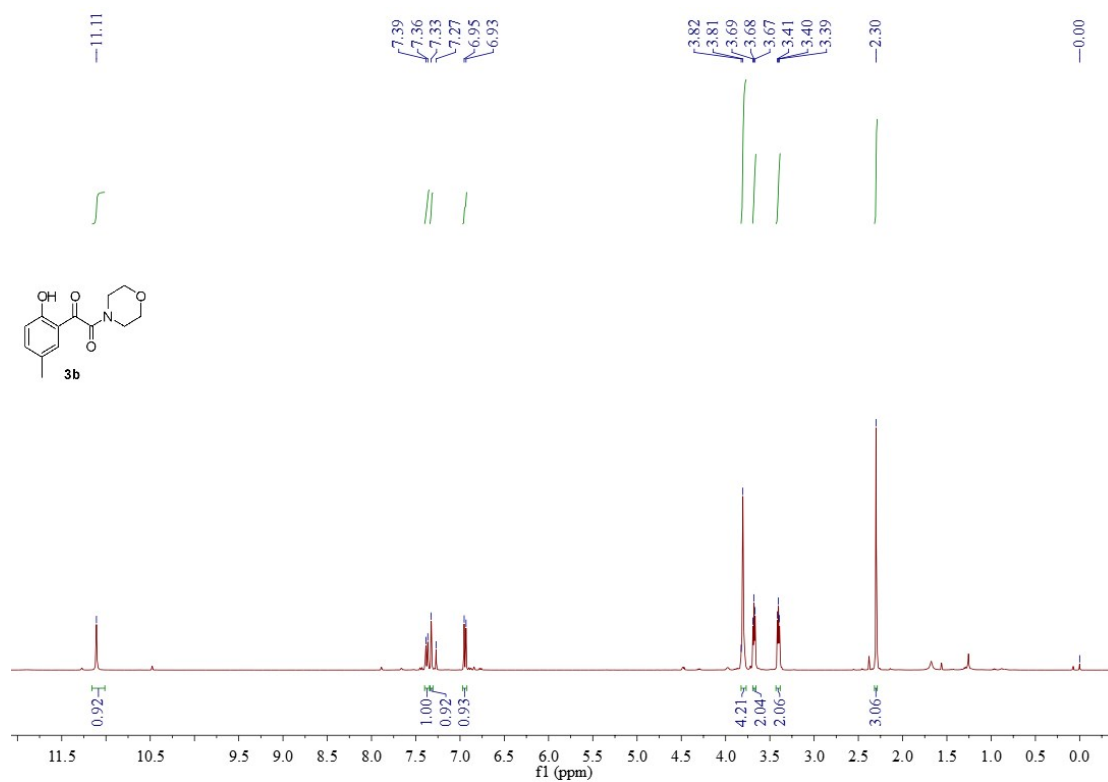

<sup>13</sup>C NMR (101MHz, CDCl<sub>3</sub>) spectra of **3b**

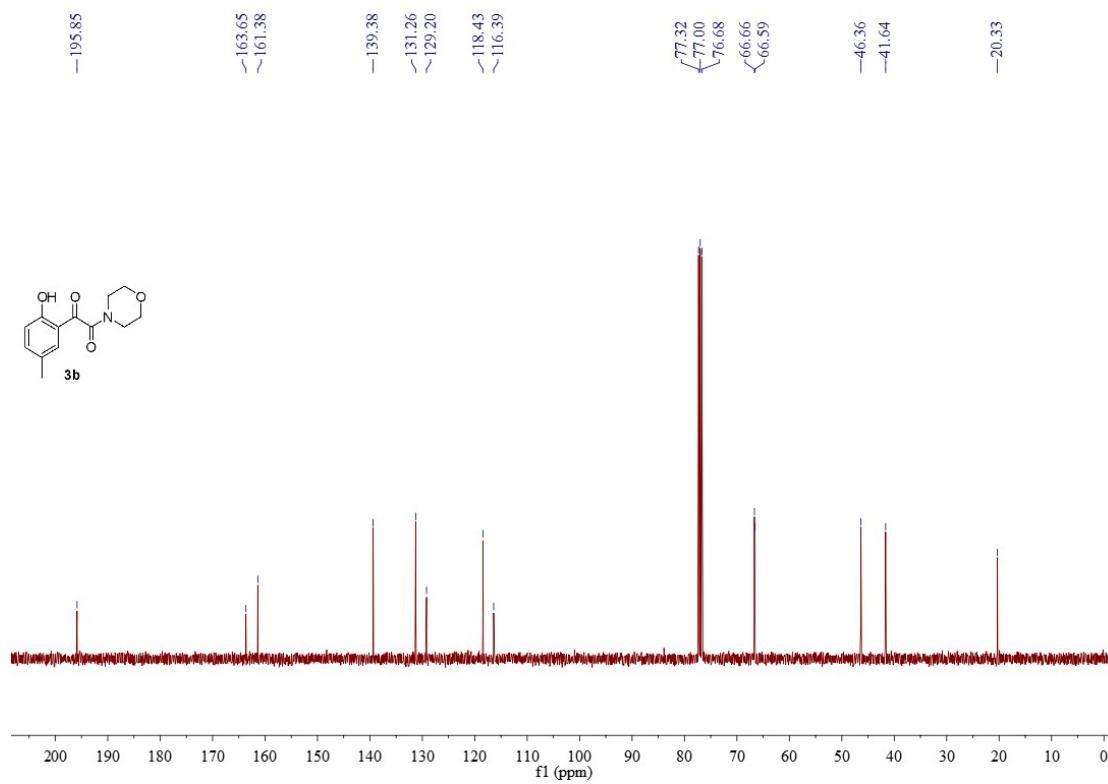

$^1\text{H}$  NMR (400MHz,  $\text{CDCl}_3$ ) spectra of **3c**

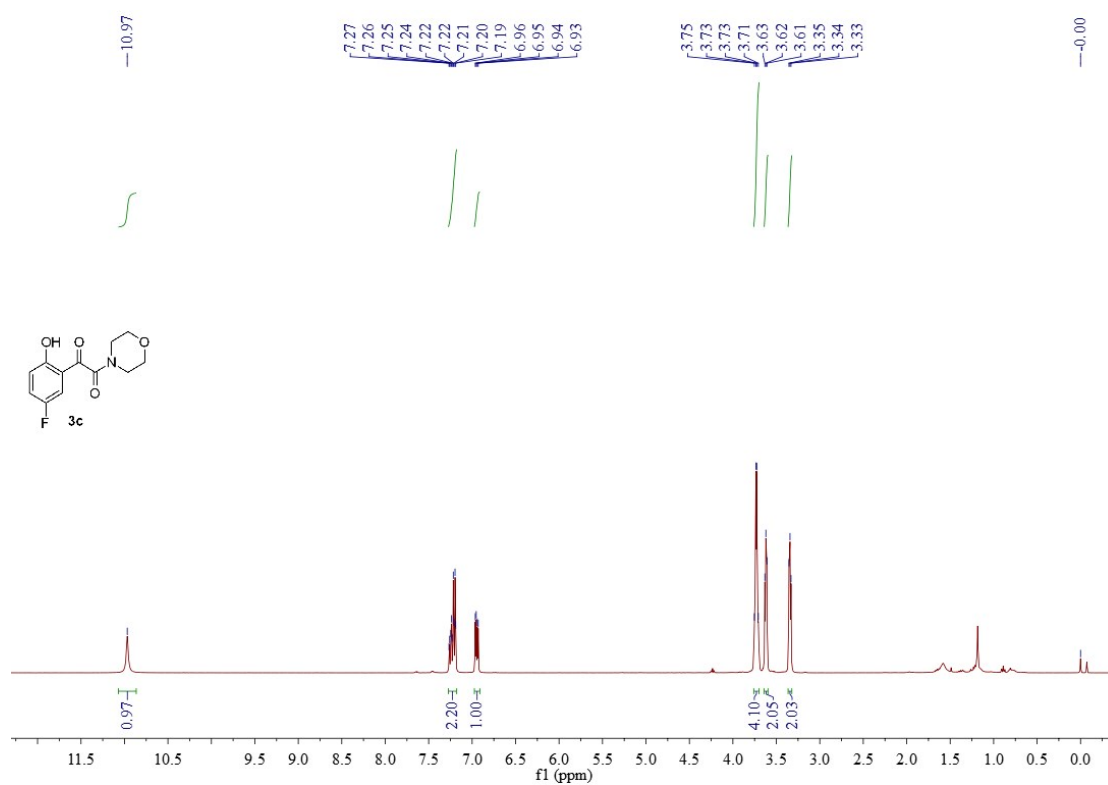

$^{19}\text{F}$  NMR (376 MHz,  $\text{CDCl}_3$ ) spectra of **3c**

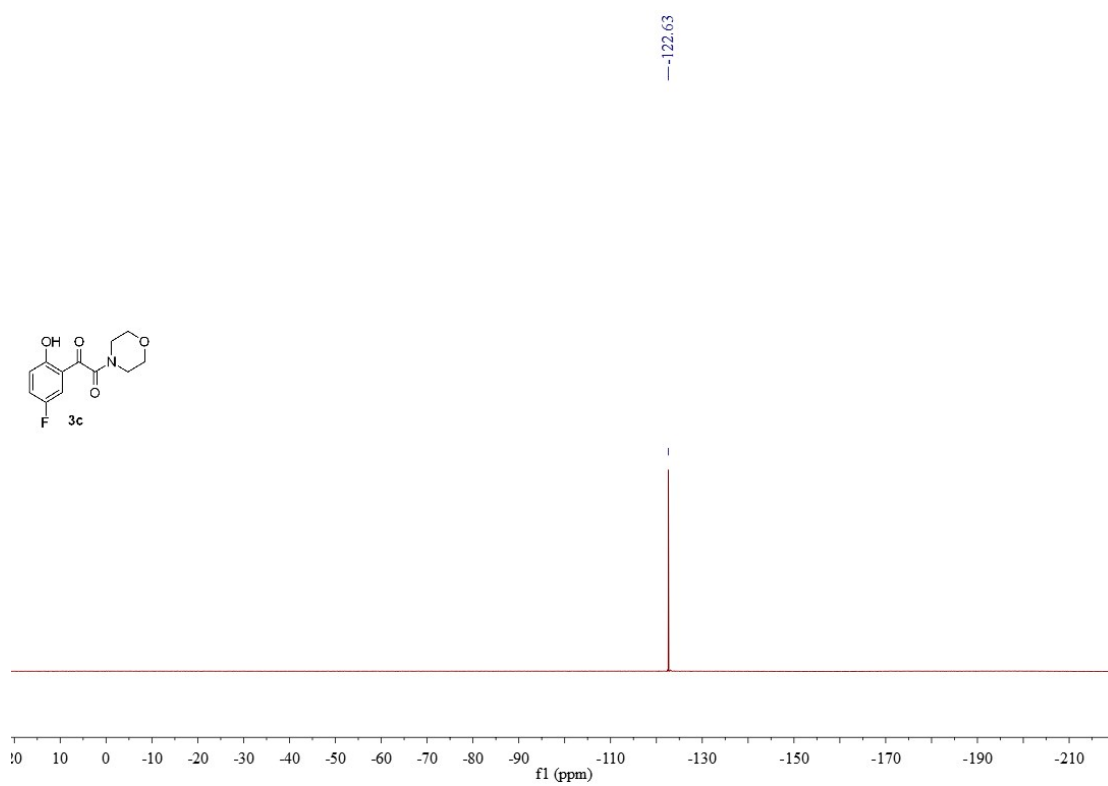

$^{13}\text{C}$  NMR (101MHz,  $\text{CDCl}_3$ ) spectra of **3c**

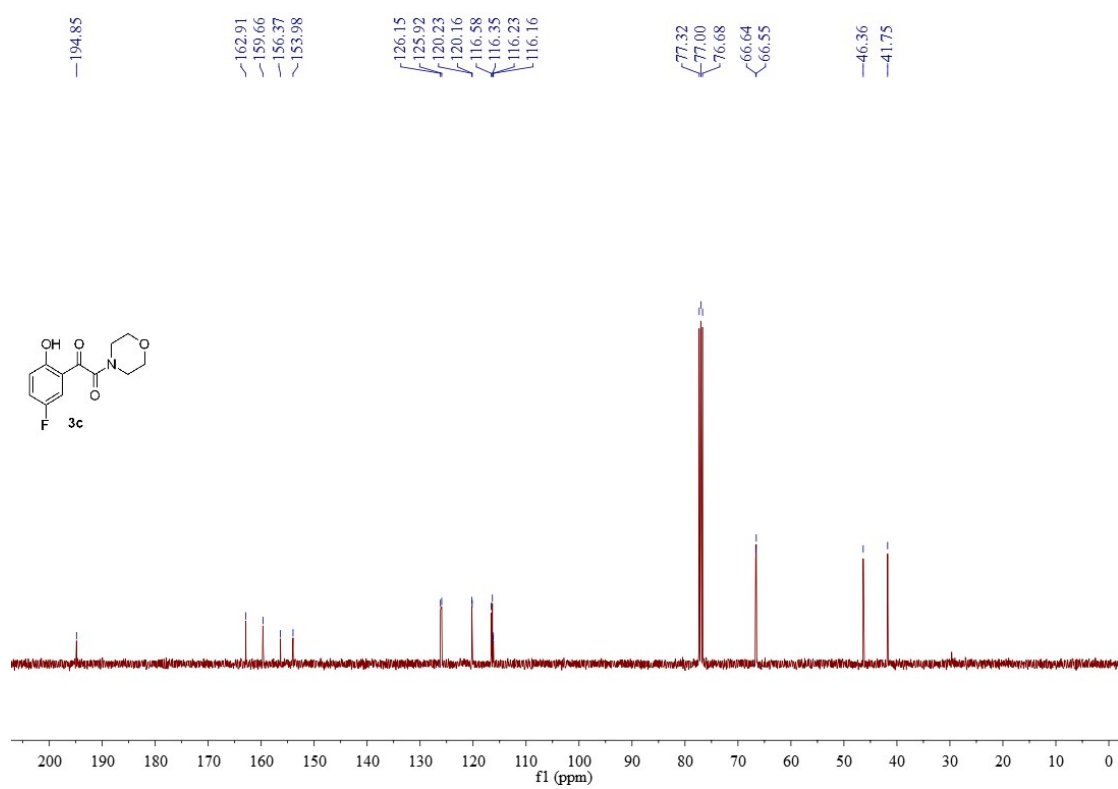



<sup>1</sup>H NMR (400MHz, CDCl<sub>3</sub>) spectra of **3d**

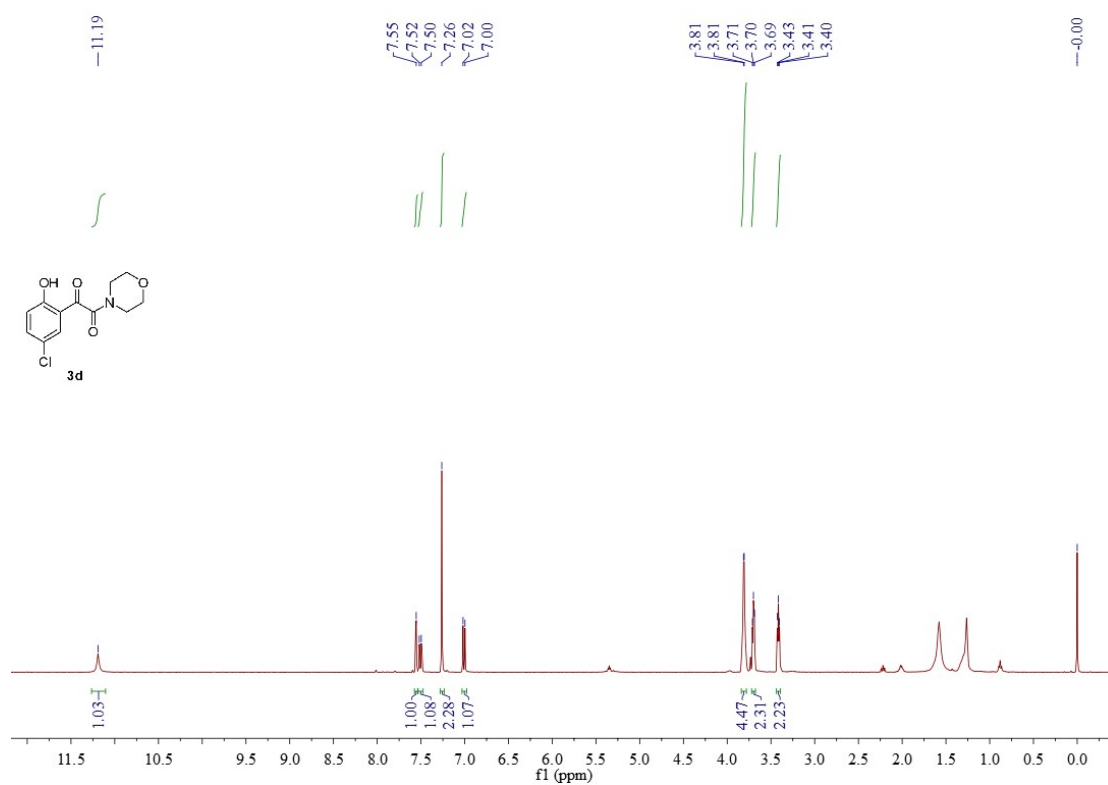

<sup>13</sup>C NMR (101MHz, CDCl<sub>3</sub>) spectra of **3d**

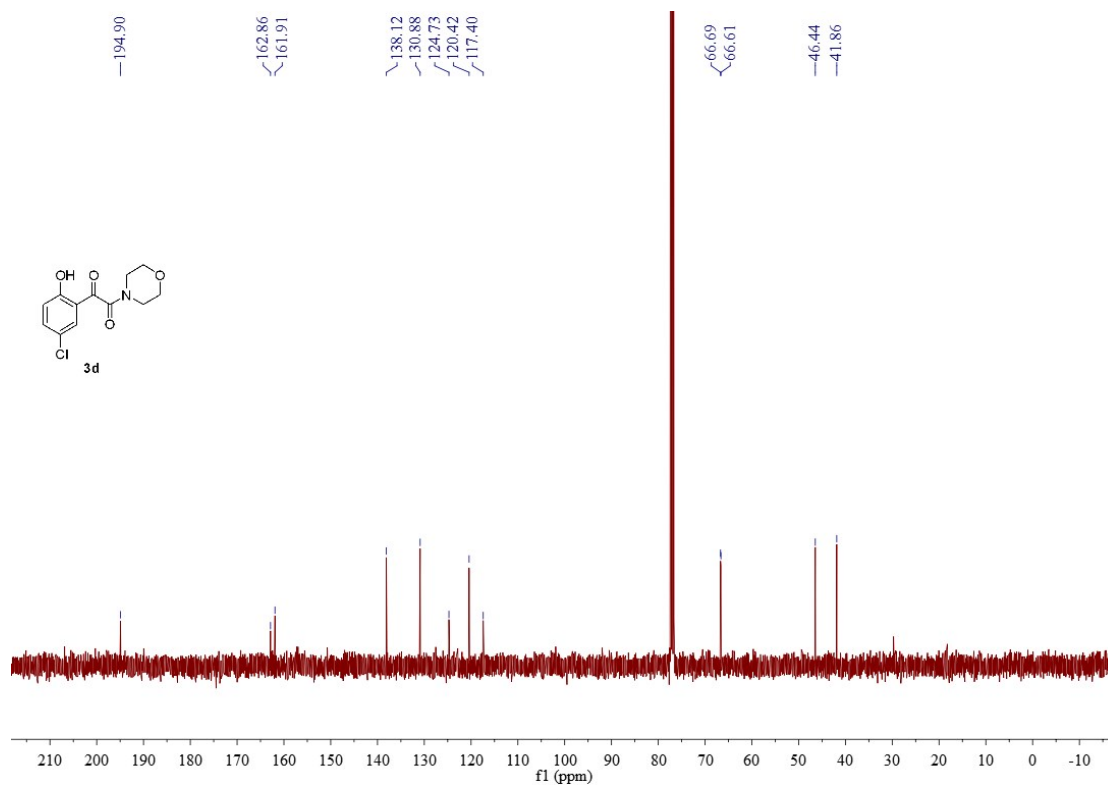

<sup>1</sup>H NMR (400MHz, CDCl<sub>3</sub>) spectra of **3e**

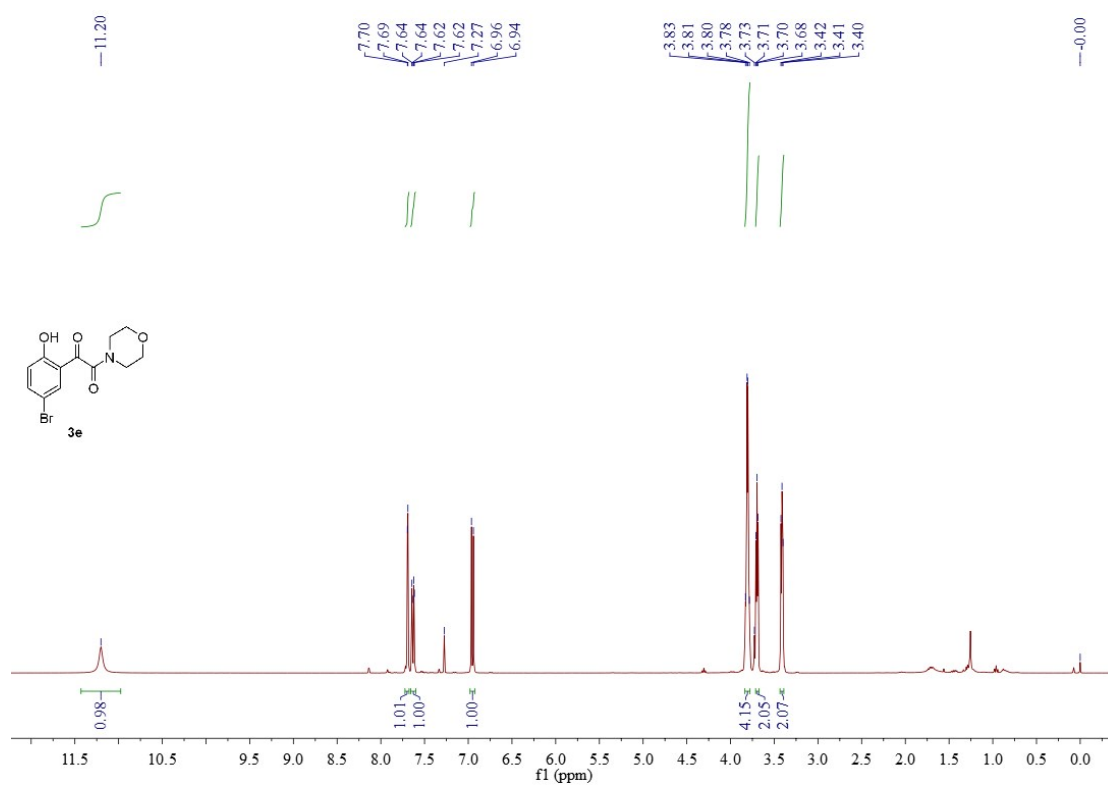

<sup>13</sup>C NMR (101MHz, CDCl<sub>3</sub>) spectra of **3e**

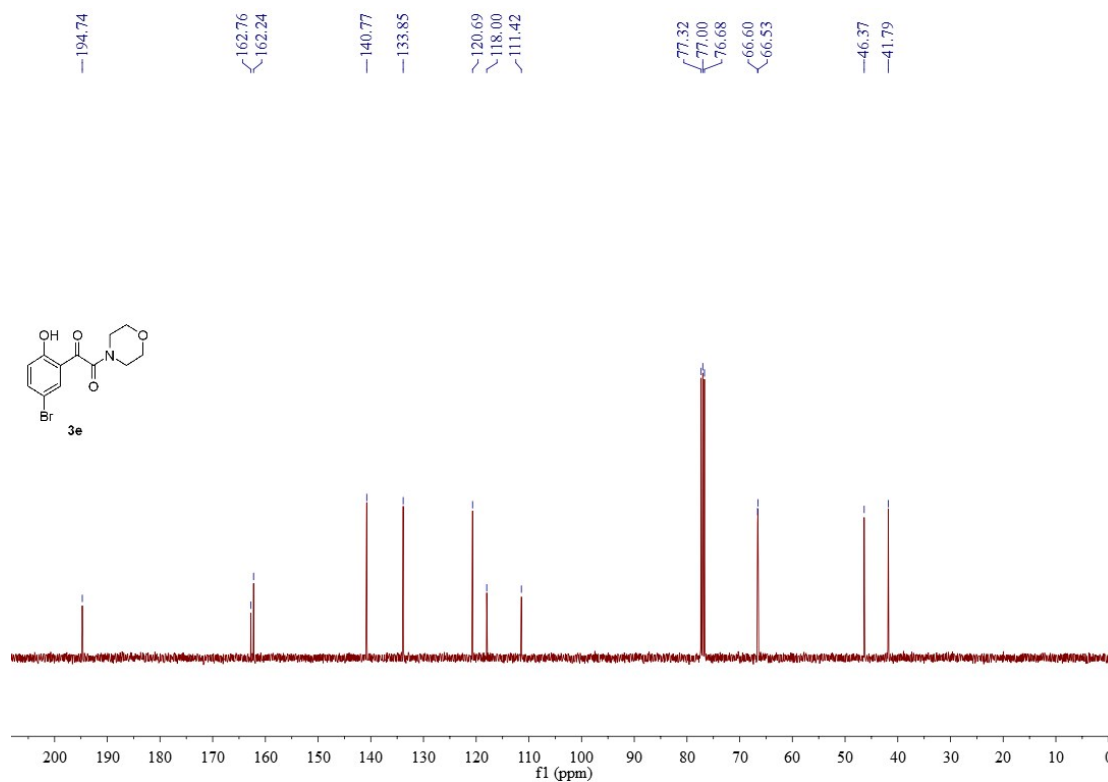

<sup>1</sup>H NMR (400MHz, CDCl<sub>3</sub>) spectra of **3f**

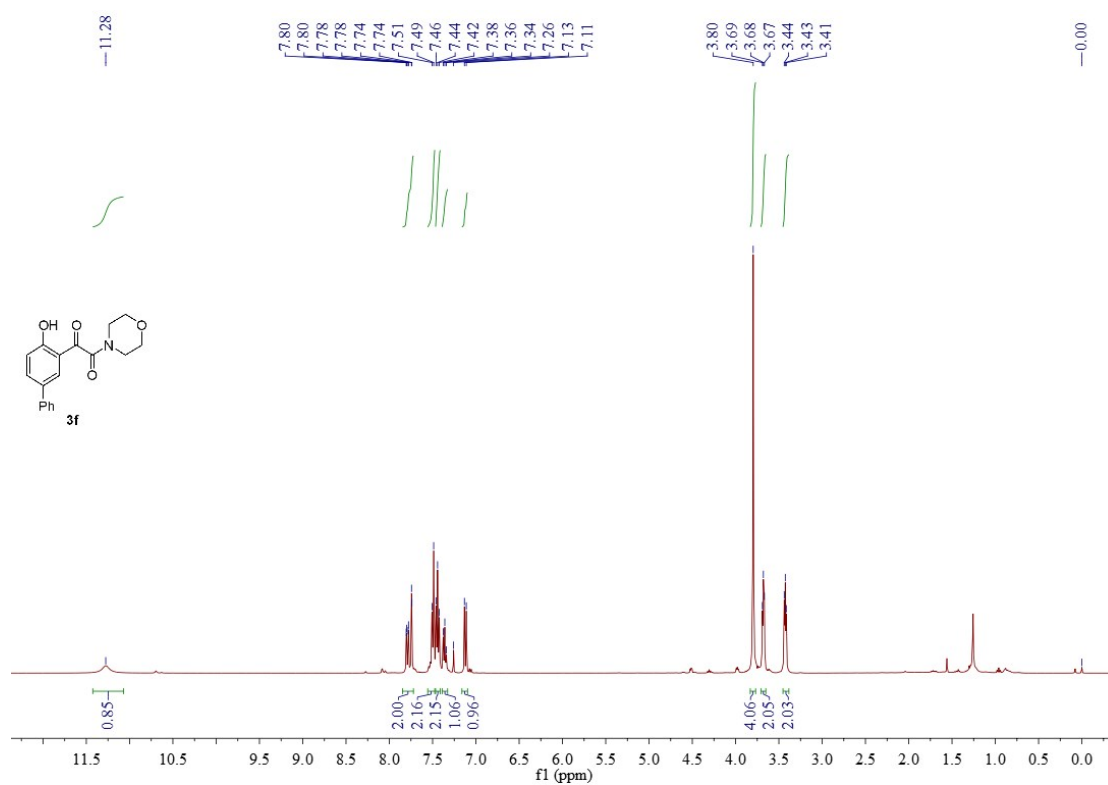

<sup>13</sup>C NMR (101MHz, CDCl<sub>3</sub>) spectra of **3f**

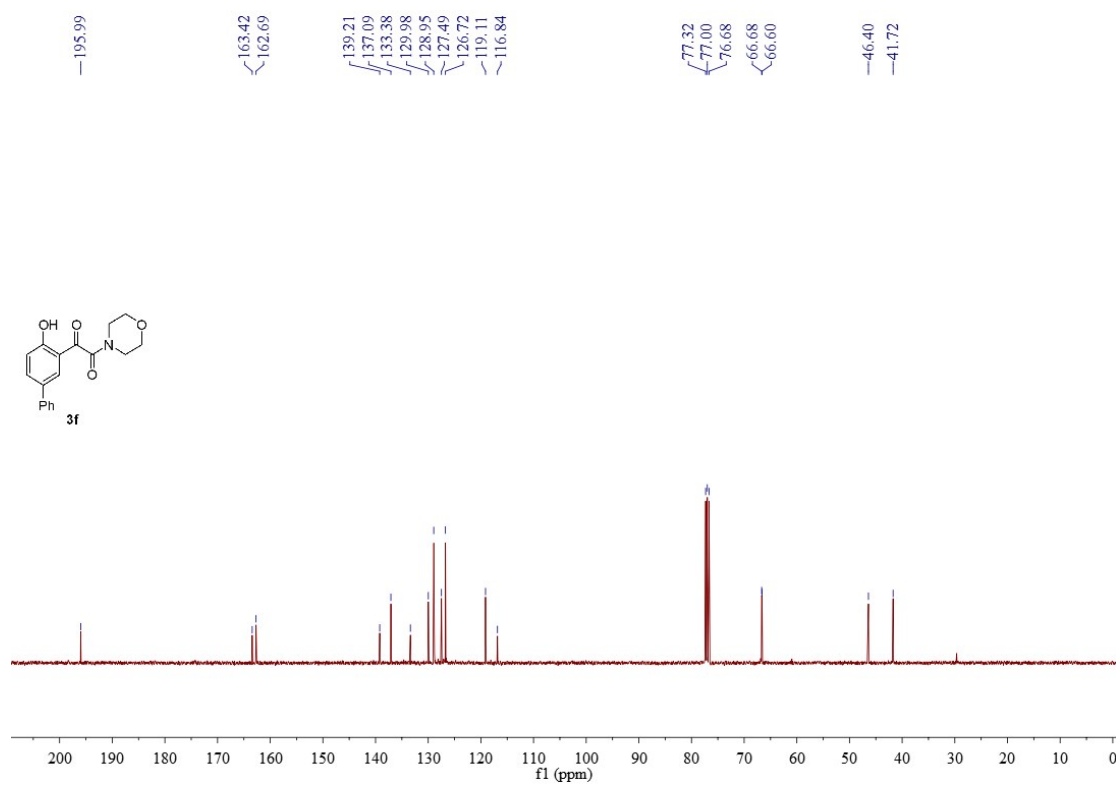

<sup>1</sup>H NMR (400MHz, CDCl<sub>3</sub>) spectra of **3g**

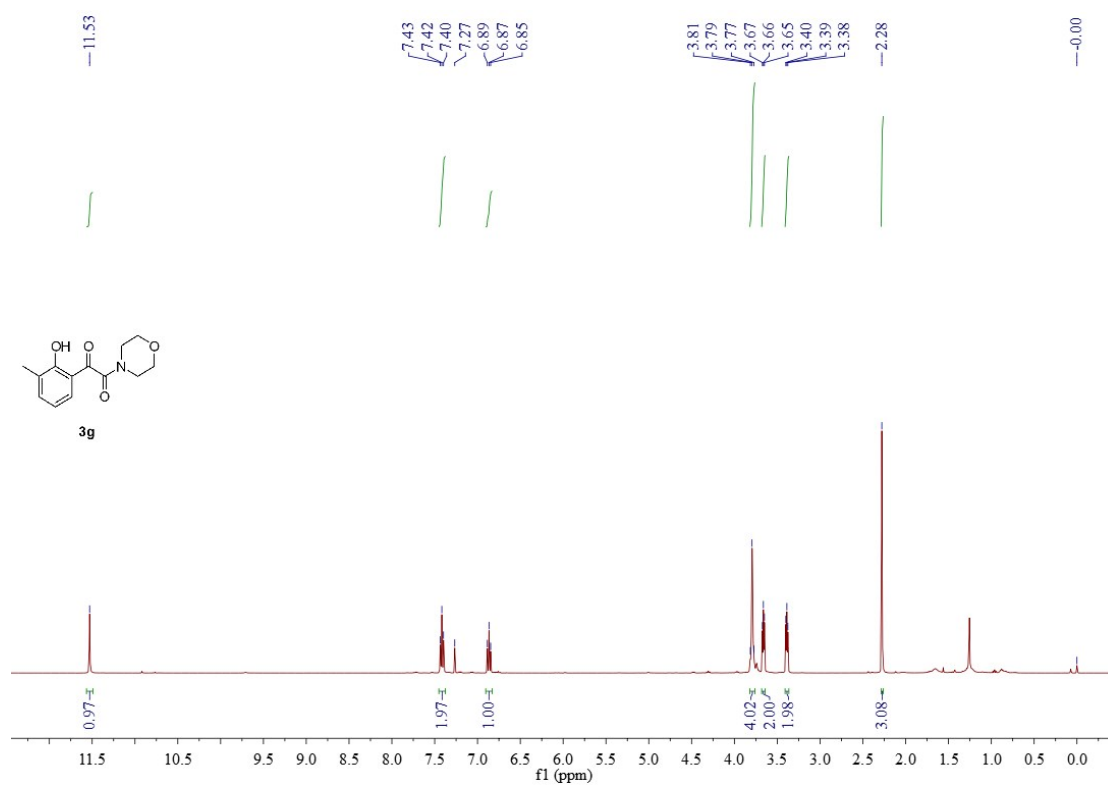

<sup>13</sup>C NMR (101MHz, CDCl<sub>3</sub>) spectra of **3g**

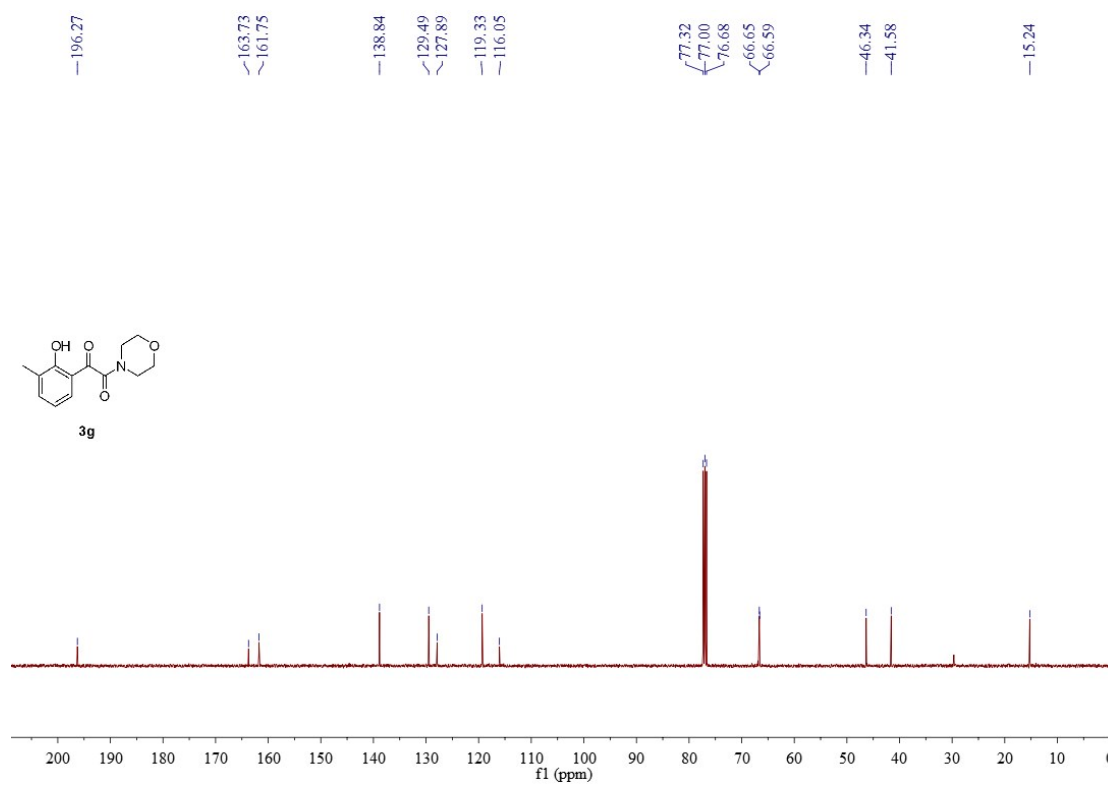

<sup>1</sup>H NMR (400MHz, CDCl<sub>3</sub>) spectra of **3h**

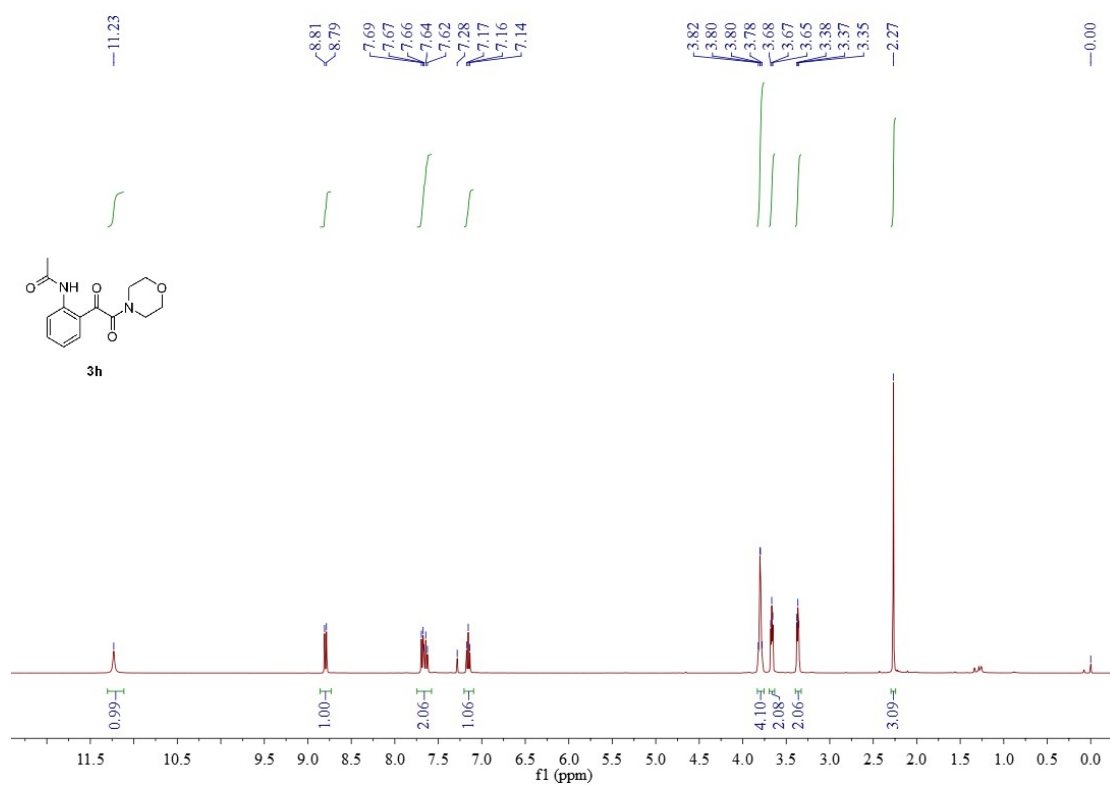

<sup>13</sup>C NMR (101MHz, CDCl<sub>3</sub>) spectra of **3h**

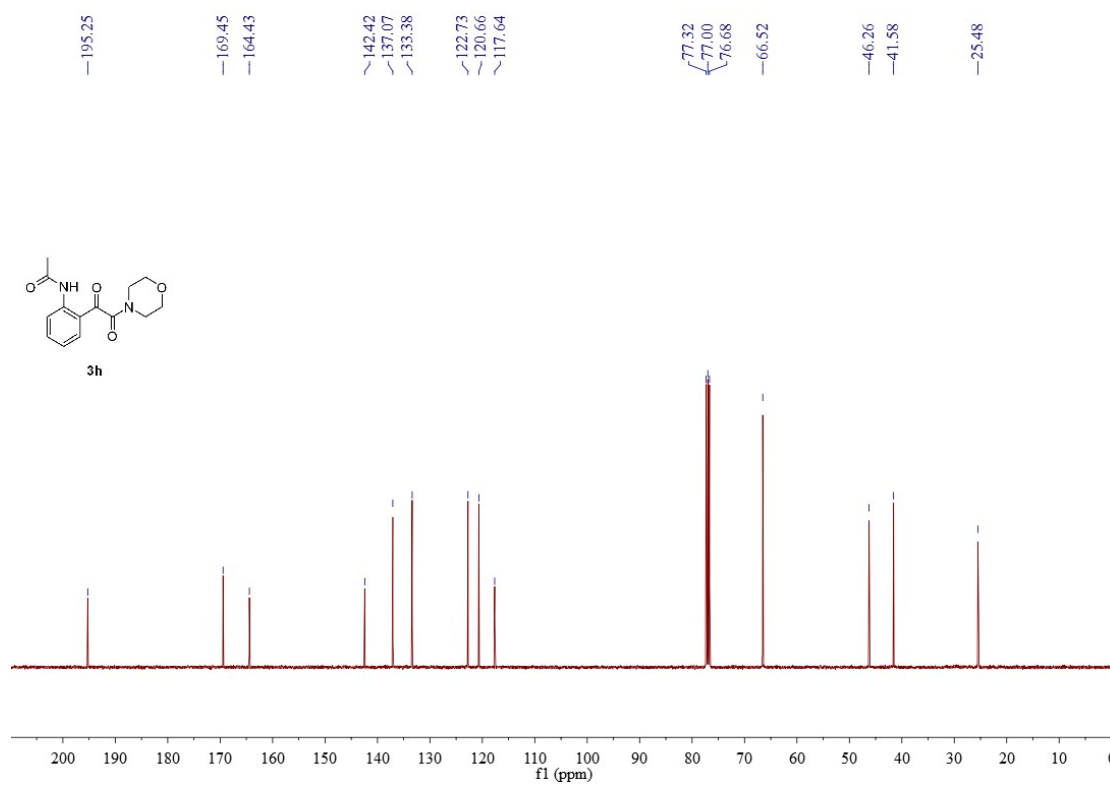

<sup>1</sup>H NMR (400MHz, CDCl<sub>3</sub>) spectra of **3i**

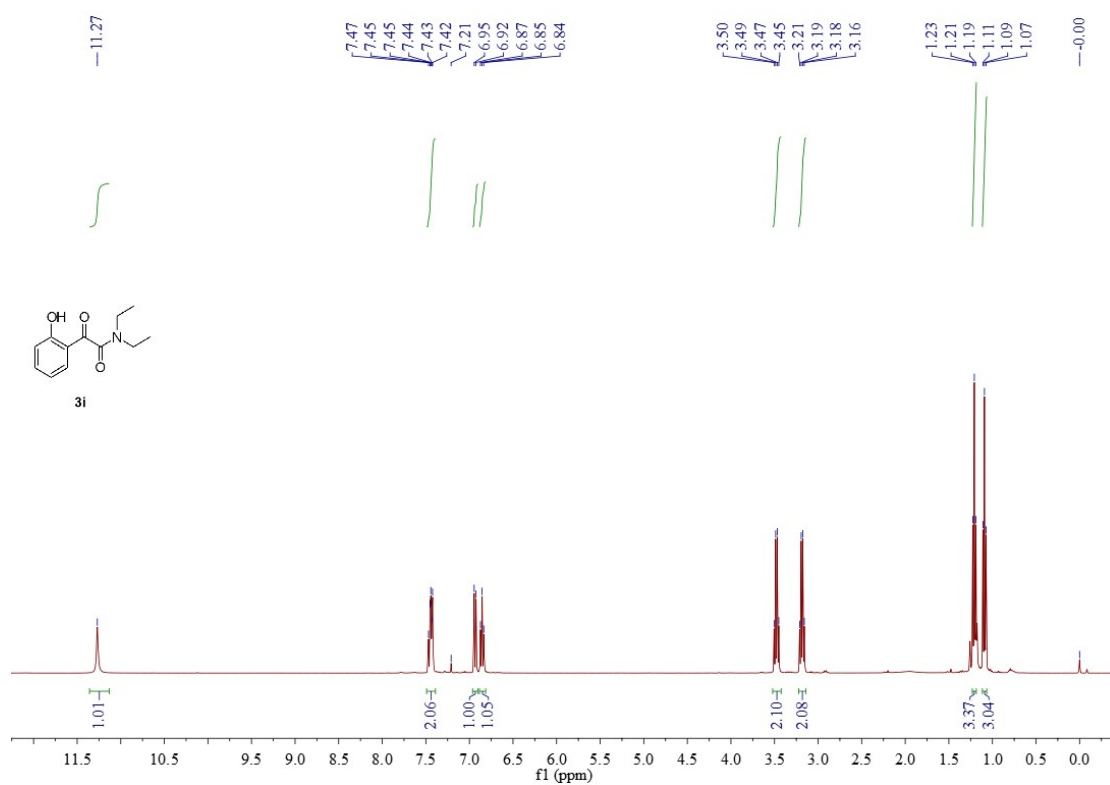

<sup>13</sup>C NMR (101MHz, CDCl<sub>3</sub>) spectra of **3i**

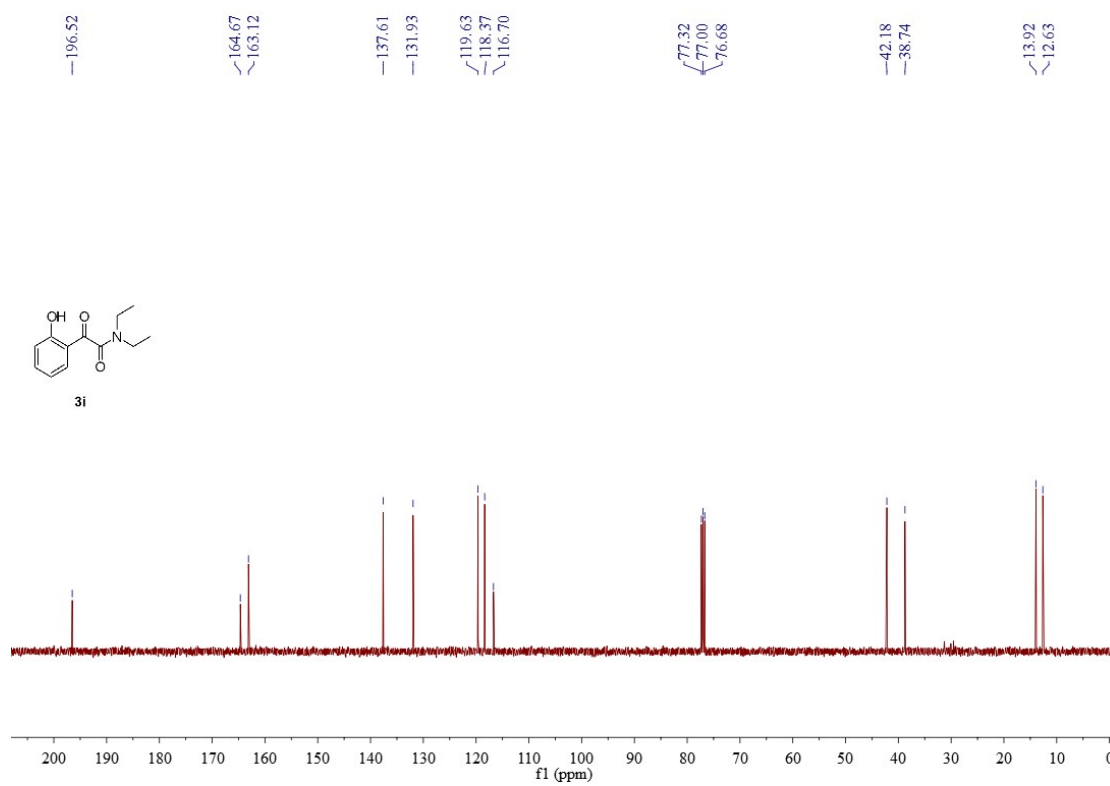

<sup>1</sup>H NMR (400MHz, CDCl<sub>3</sub>) spectra of **3j**

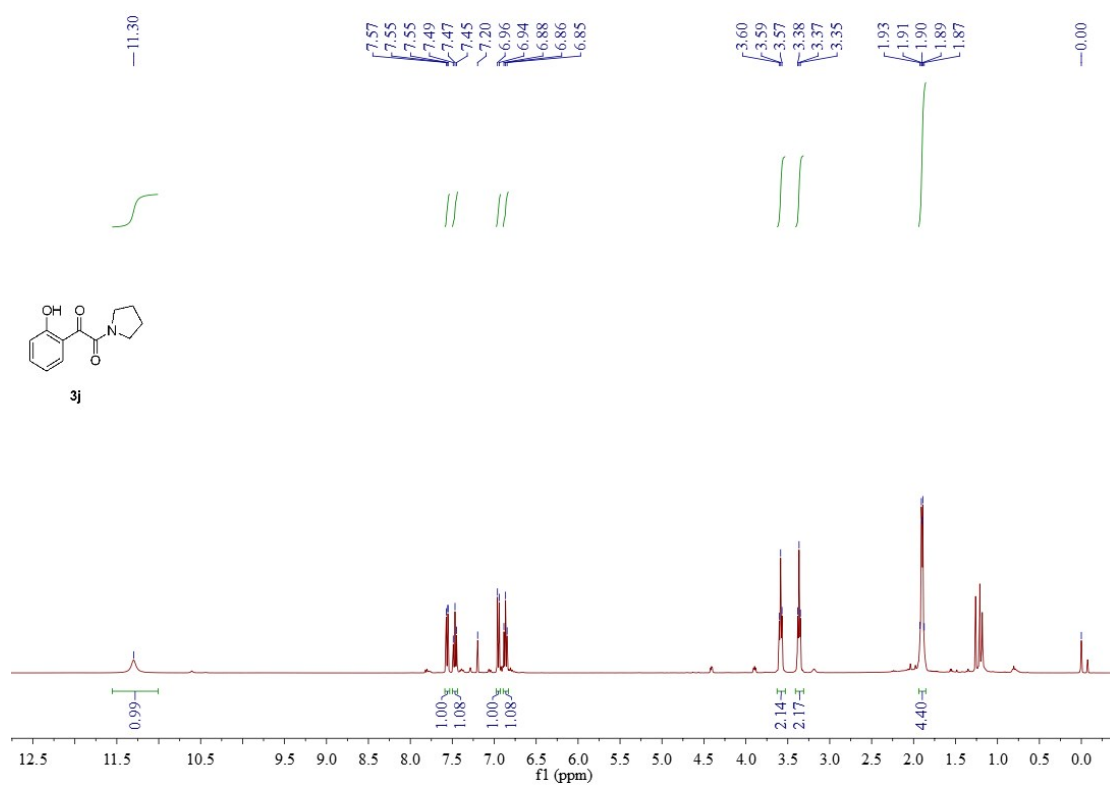

<sup>13</sup>C NMR (101MHz, CDCl<sub>3</sub>) spectra of **3j**

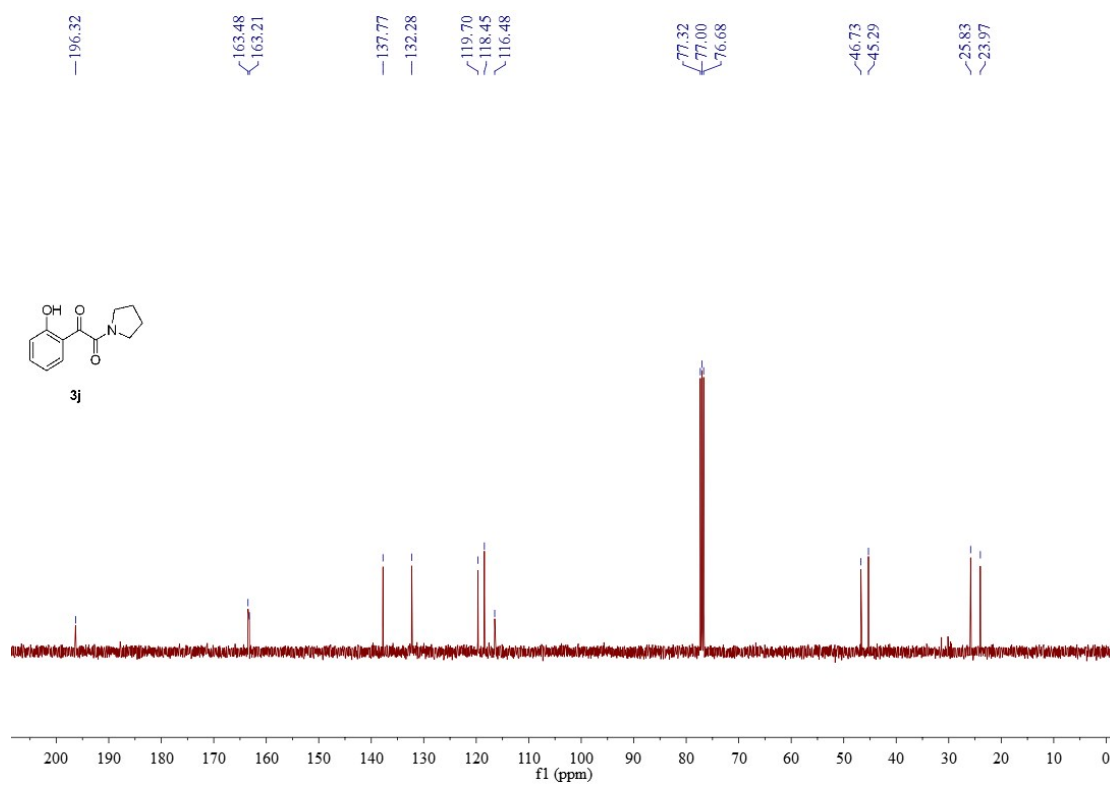

<sup>1</sup>H NMR (400MHz, CDCl<sub>3</sub>) spectra of **3k**

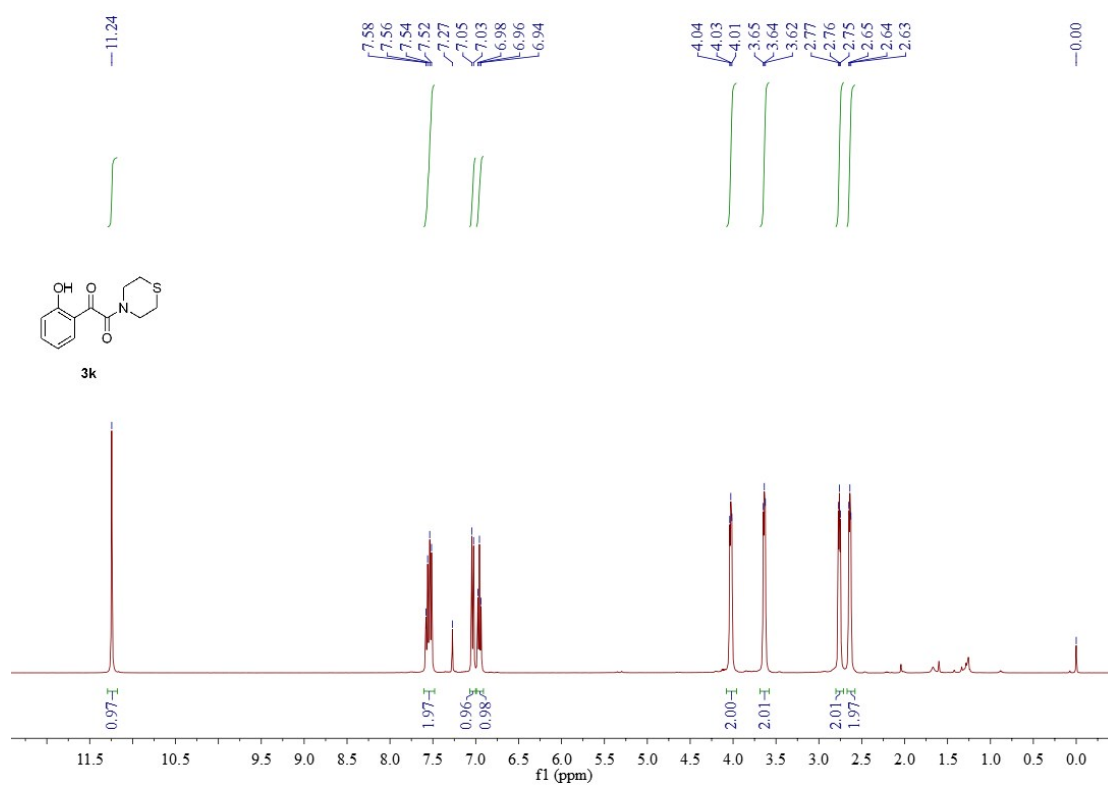

<sup>13</sup>C NMR (101MHz, CDCl<sub>3</sub>) spectra of **3k**

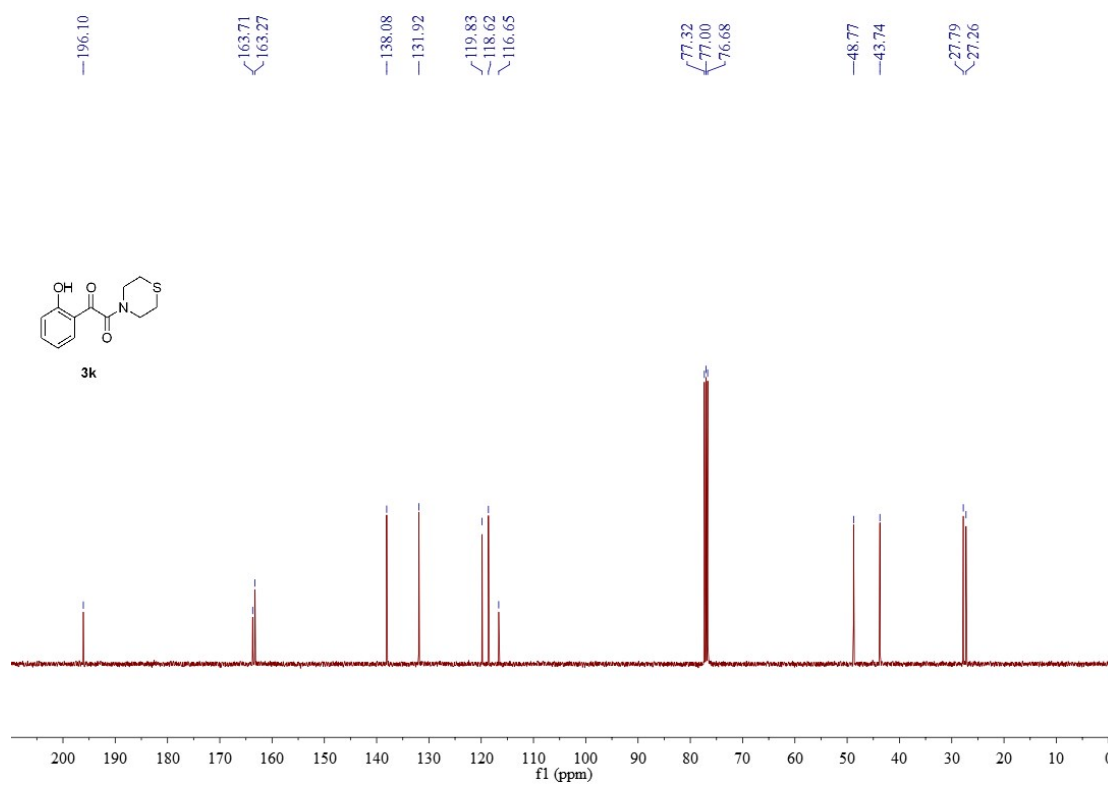



<sup>1</sup>H NMR (400MHz, CDCl<sub>3</sub>) spectra of **31**

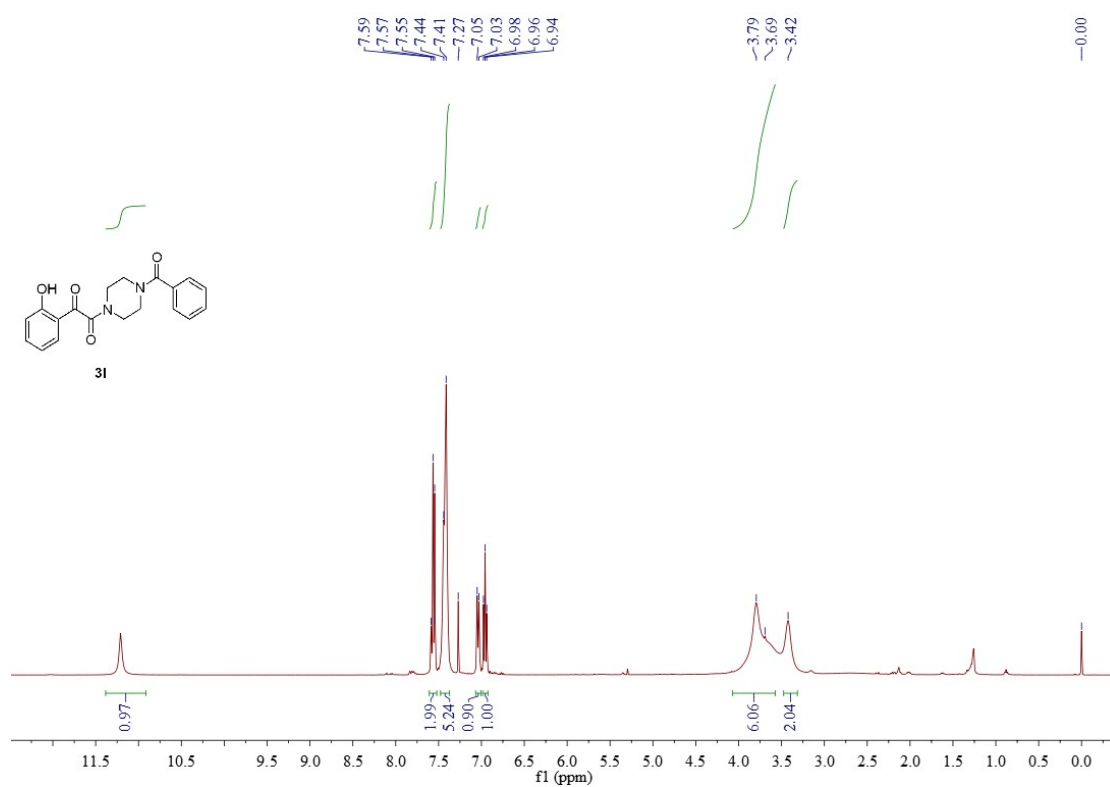

<sup>13</sup>C NMR (101MHz, CDCl<sub>3</sub>) spectra of **31**

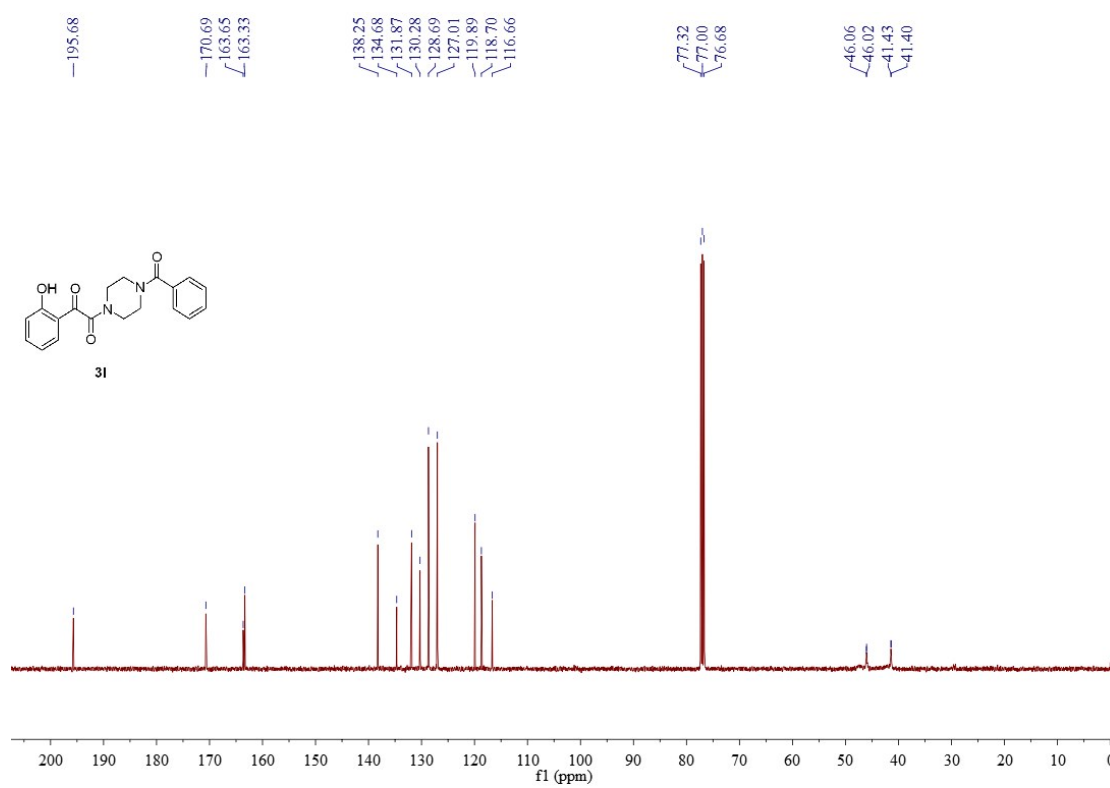

$^1\text{H}$  NMR (400MHz,  $\text{CDCl}_3$ ) spectra of **3p'**

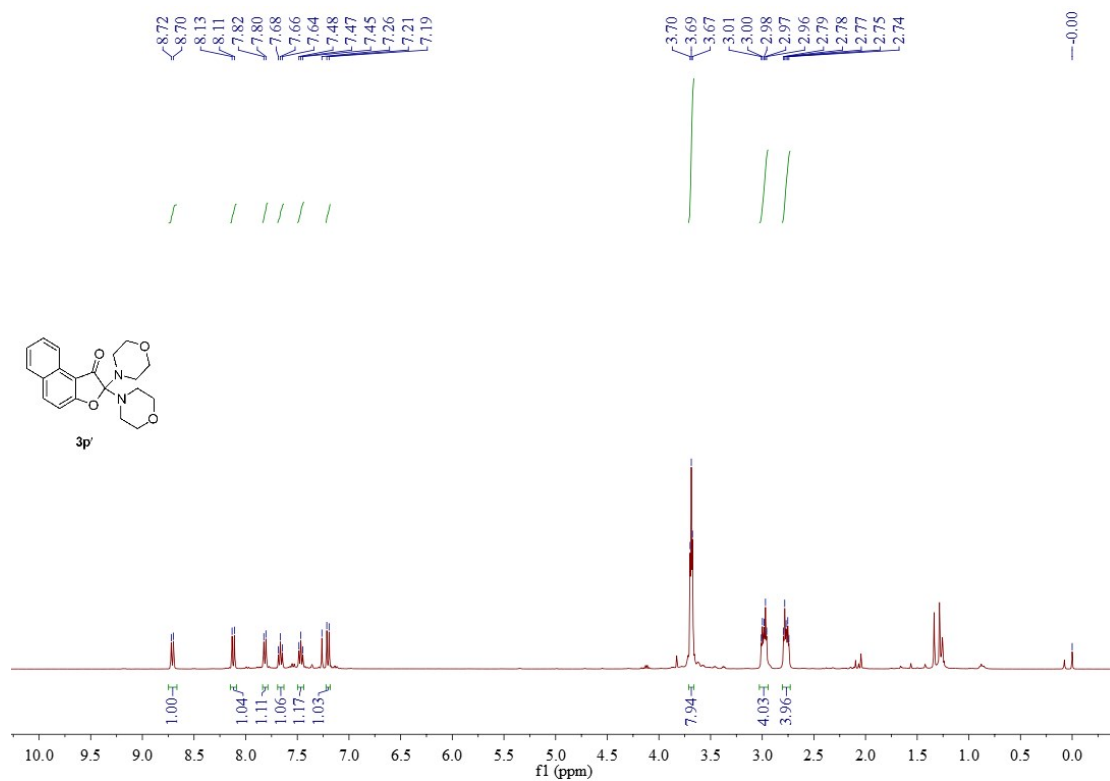

$^{13}\text{C}$  NMR (101MHz,  $\text{CDCl}_3$ ) spectra of **3p'**

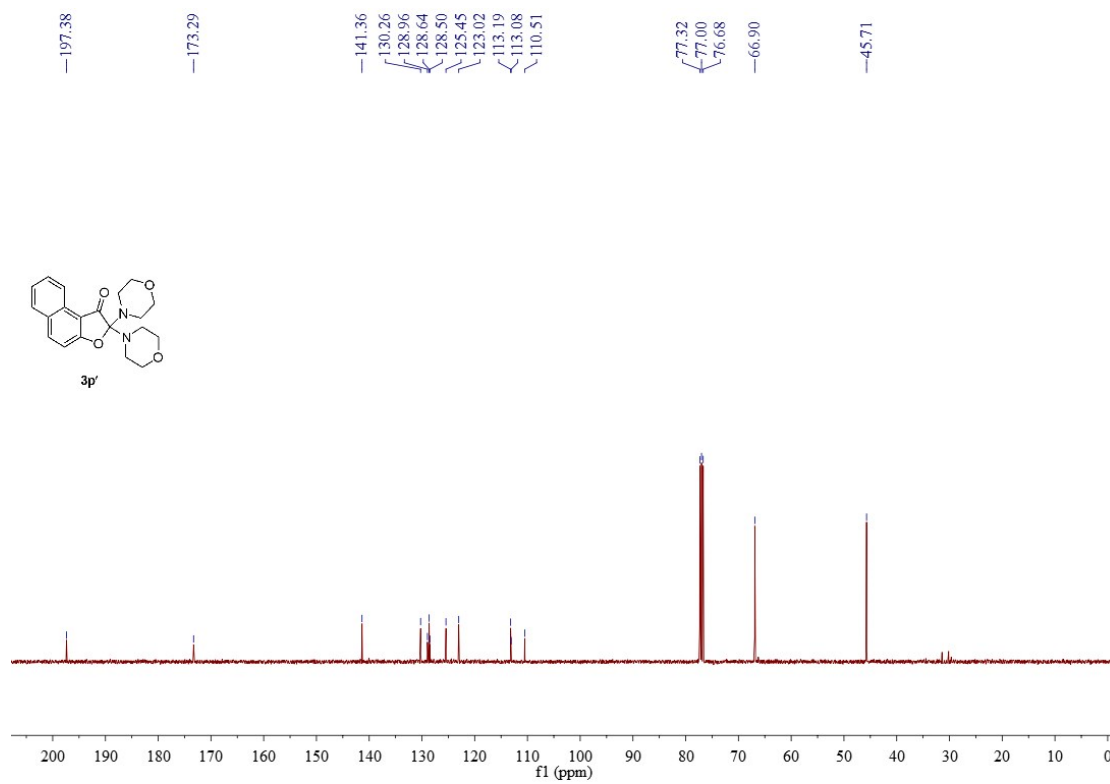

<sup>1</sup>H NMR (400MHz, CDCl<sub>3</sub>) spectra of **4**

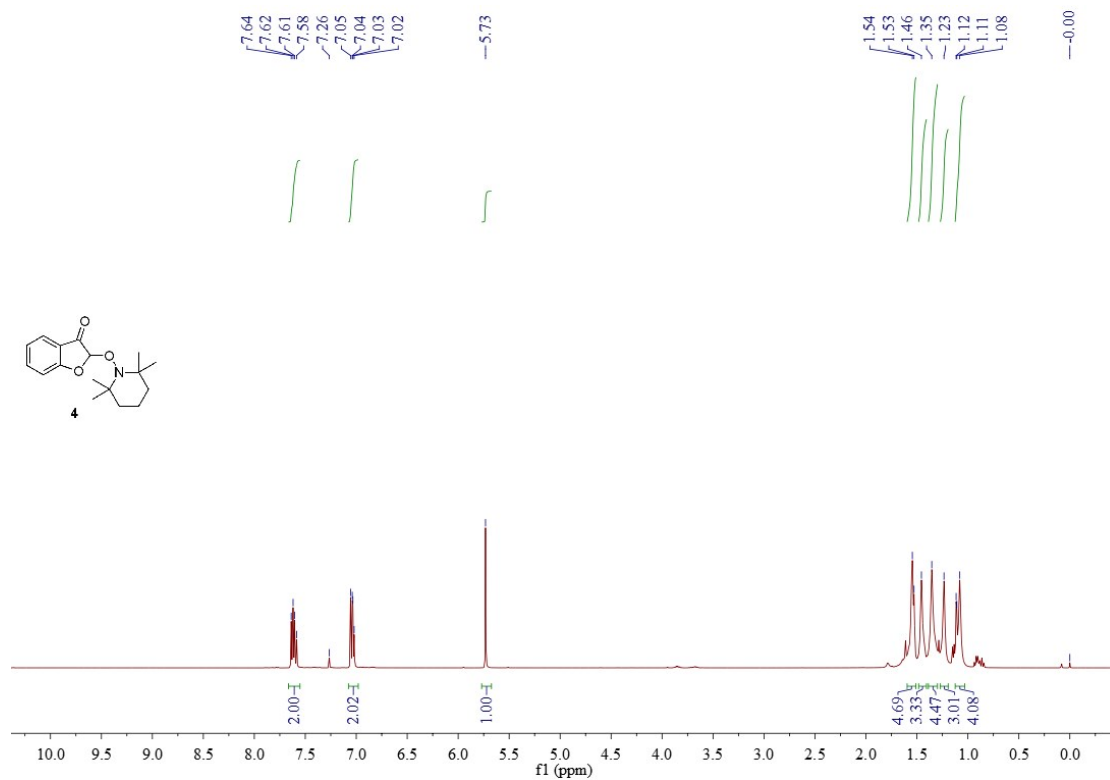

<sup>13</sup>C NMR (101MHz, CDCl<sub>3</sub>) spectra of **4**

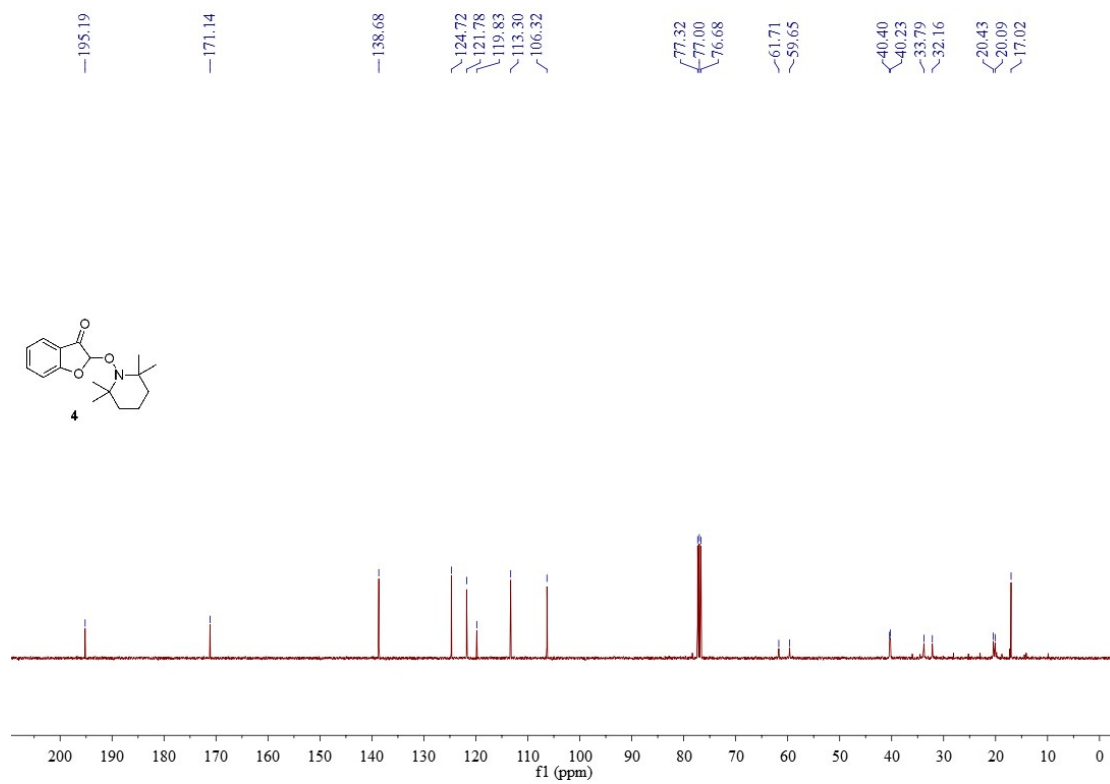

Supplement: d1ob00715g1.pdf [file d1ob00715g1.pdf]
